# Supplementary material for: The Evolutionary Genetics of the Genes Underlying Phenotypic Associations for Loblolly Pine (Pinus taeda, Pinaceae)
Source: Oxford University Press journal article supplement (doi:10.1534/genetics.113.157198), 2013-10-12
Supplement: figures1.pdf [file figures1.pdf]

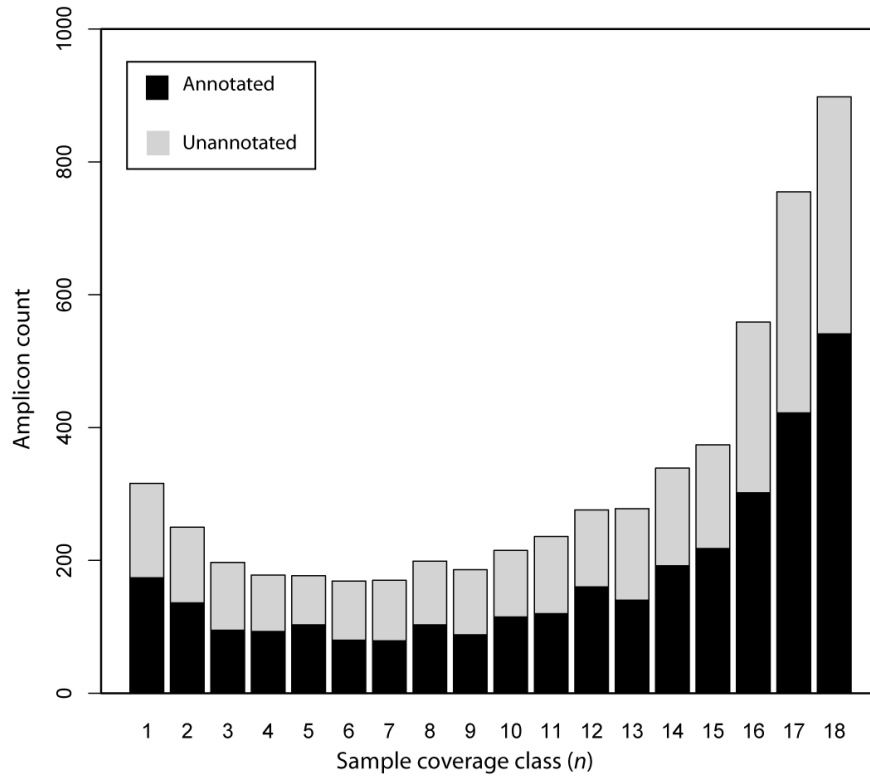

**Figure S1** The frequency distribution of sample sizes across all 5,773 amplicons reveals that the majority of amplicons have 10 or more samples. Colors distinguish amplicons for which coding and noncoding regions could be annotated (black) from those that could not (gray).
