# Supplementary material for: The Evolutionary Genetics of the Genes Underlying Phenotypic Associations for Loblolly Pine (Pinus taeda, Pinaceae)
Source: Oxford University Press journal article supplement (doi:10.1534/genetics.113.157198), 2013-10-12
Supplement: figures2.pdf [file figures2.pdf]

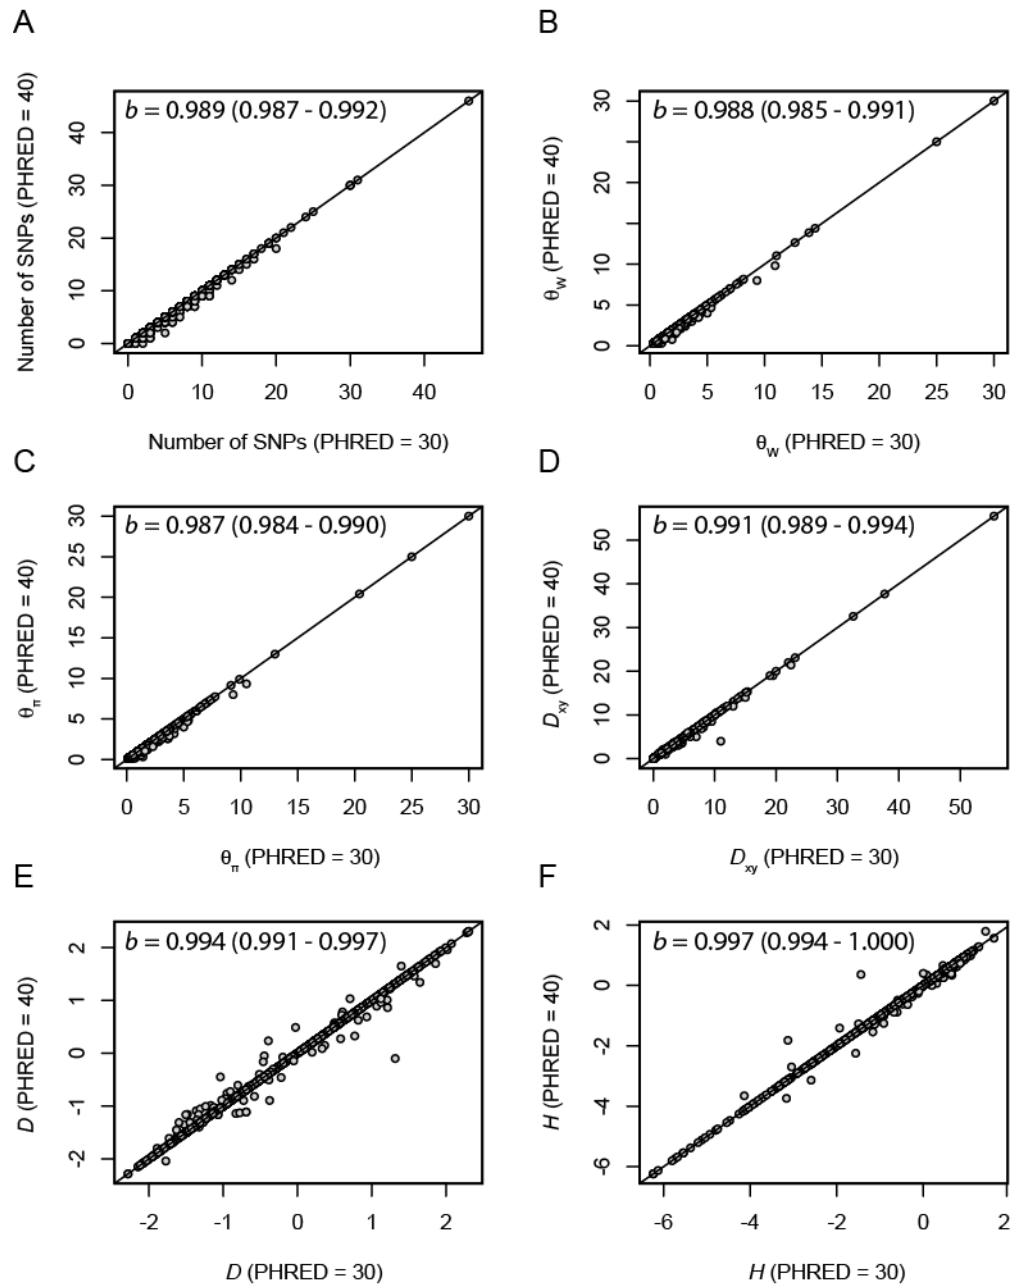

**Figure S2** The correlation between various estimates of nucleotide diversity and divergence for two different cutoffs of base calling quality (PHRED 30 and PHRED 40). Summary statistics ( $b$  = slope (95% confidence interval)) of linear models are given in the upper left of each plot.
