# Supplementary material for: The Evolutionary Genetics of the Genes Underlying Phenotypic Associations for Loblolly Pine (Pinus taeda, Pinaceae)
Source: Oxford University Press journal article supplement (doi:10.1534/genetics.113.157198), 2013-10-12
Supplement: figures7.pdf [file figures7.pdf]

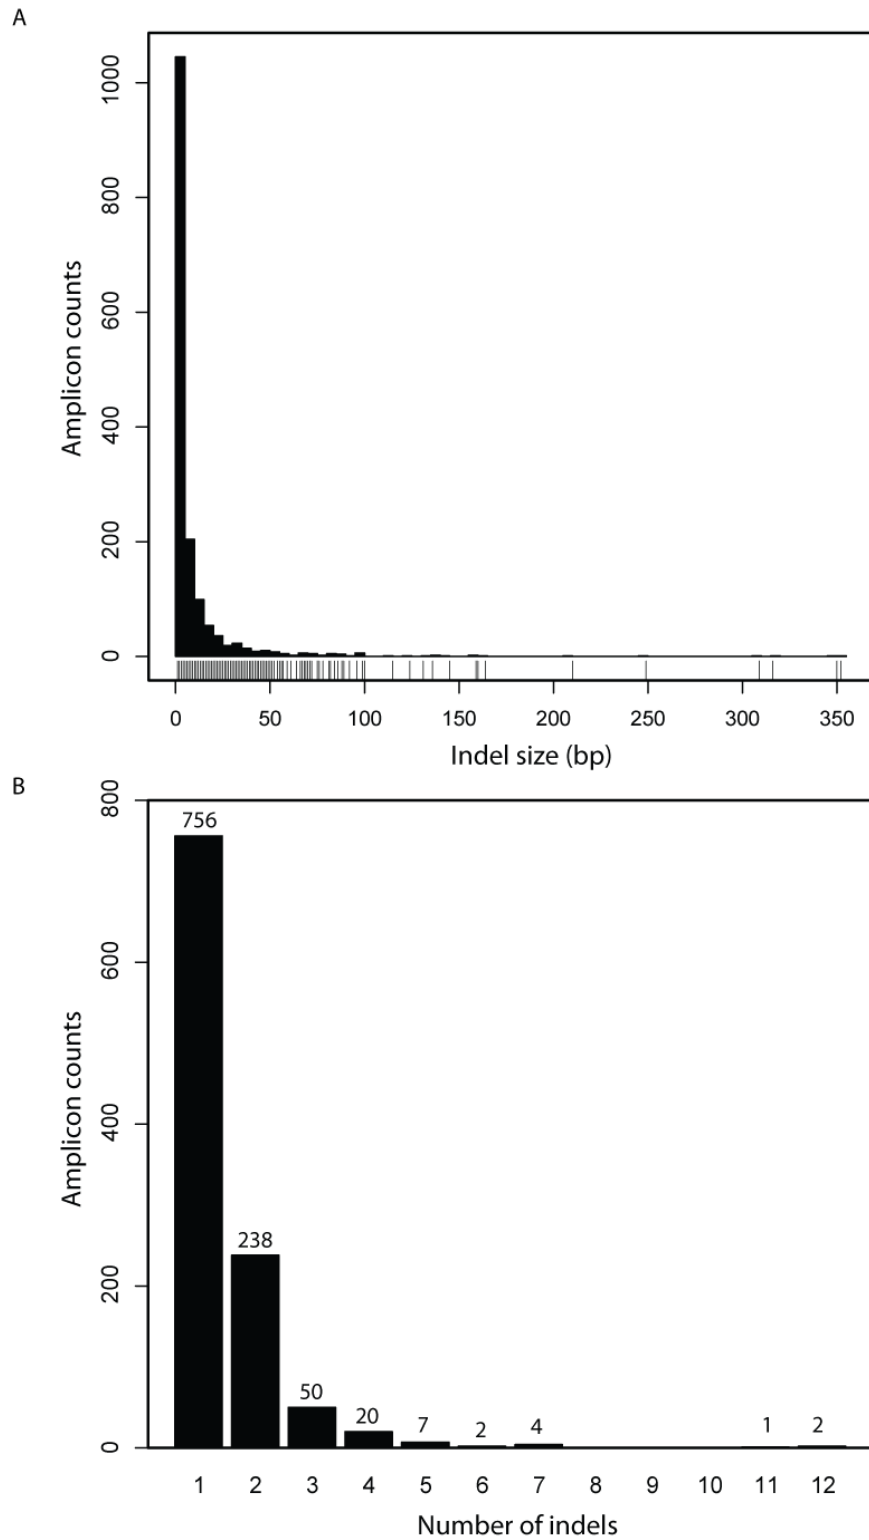

**Figure S7** Frequency distribution for indel size (A) and the number of indels per amplicon (B). The rug plot in panel A identifies bins in the histogram that are difficult to differentiate.
