# Supplementary material for: The Evolutionary Genetics of the Genes Underlying Phenotypic Associations for Loblolly Pine (Pinus taeda, Pinaceae)
Source: Oxford University Press journal article supplement (doi:10.1534/genetics.113.157198), 2013-10-12
Supplement: figures8.pdf [file figures8.pdf]

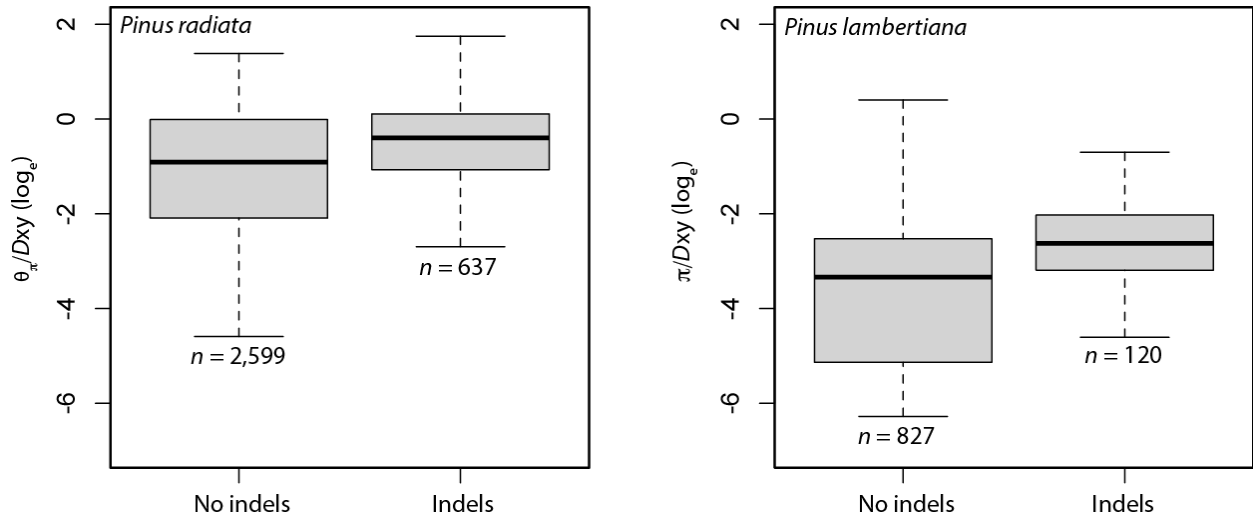

**Figure S8** Nucleotide diversity scaled by divergence differs between classes of amplicons defined based on the presence of at least one indel. The patterns are the same for divergence relative to *Pinus radiata* or *P. lambertiana*. Note that values are on a log-scale (base  $e$ ). Sample sizes for the number of amplicons in each category are below the lower whisker for each box. Whiskers extend to the data extremes.
