# Supplementary material for: The Evolutionary Genetics of the Genes Underlying Phenotypic Associations for Loblolly Pine (Pinus taeda, Pinaceae)
Source: Oxford University Press journal article supplement (doi:10.1534/genetics.113.157198), 2013-10-12
Supplement: figures9.pdf [file figures9.pdf]

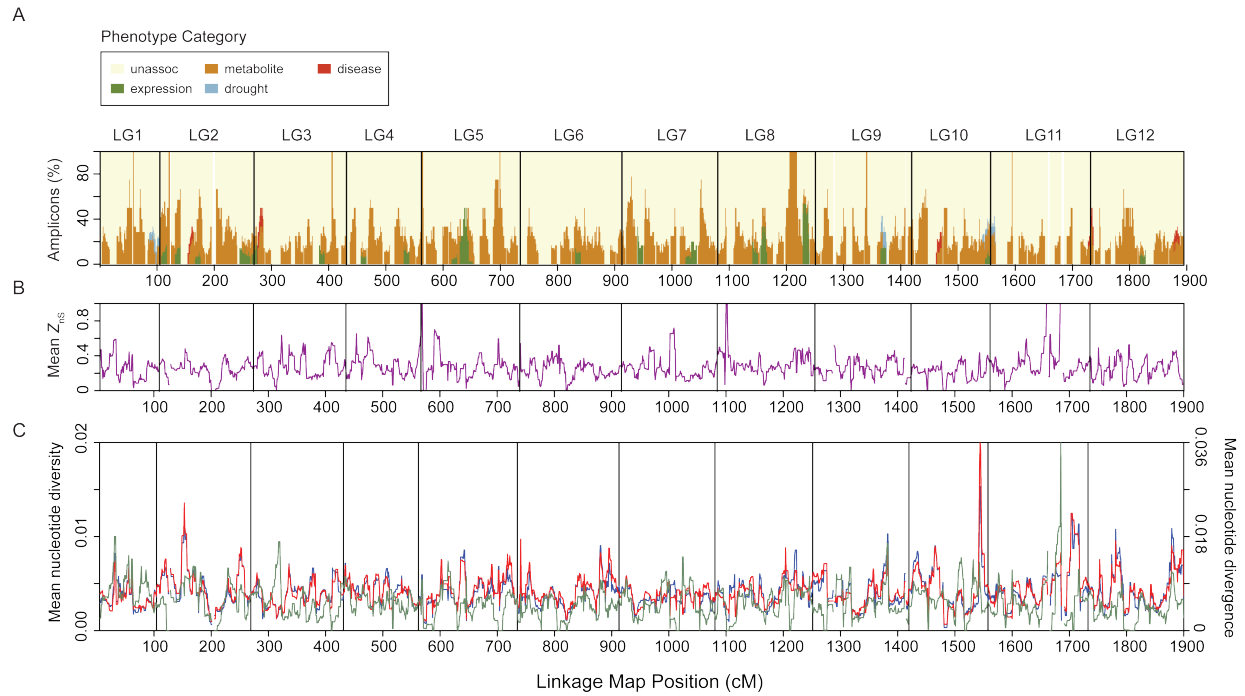

**Figure S9** Distributions of gene categories, linkage disequilibrium, nucleotide diversity and nucleotide divergence across the consensus linkage map of loblolly pine based on sliding windows (5 cM size in steps of 2 cM). (A) Stacked bar plot of gene categories across the consensus linkage map. (B) Intragenic linkage disequilibrium, as assessed using Kelly's  $Z_{ns}$  statistic, across the consensus linkage map. (C) Nucleotide diversity ( $\theta_{\pi}$  = red,  $\theta_w$  = blue) and nucleotide divergence with respect to *P. radiata* (green) across the consensus linkage map. The number of amplicons where nucleotide divergence relative to *P. lambertiana* was defined was too small to plot across linkage groups.
