# Supplementary material for: The Evolutionary Genetics of the Genes Underlying Phenotypic Associations for Loblolly Pine (Pinus taeda, Pinaceae)
Source: Oxford University Press journal article supplement (doi:10.1534/genetics.113.157198), 2013-10-12
Supplement: figures11.pdf [file figures11.pdf]

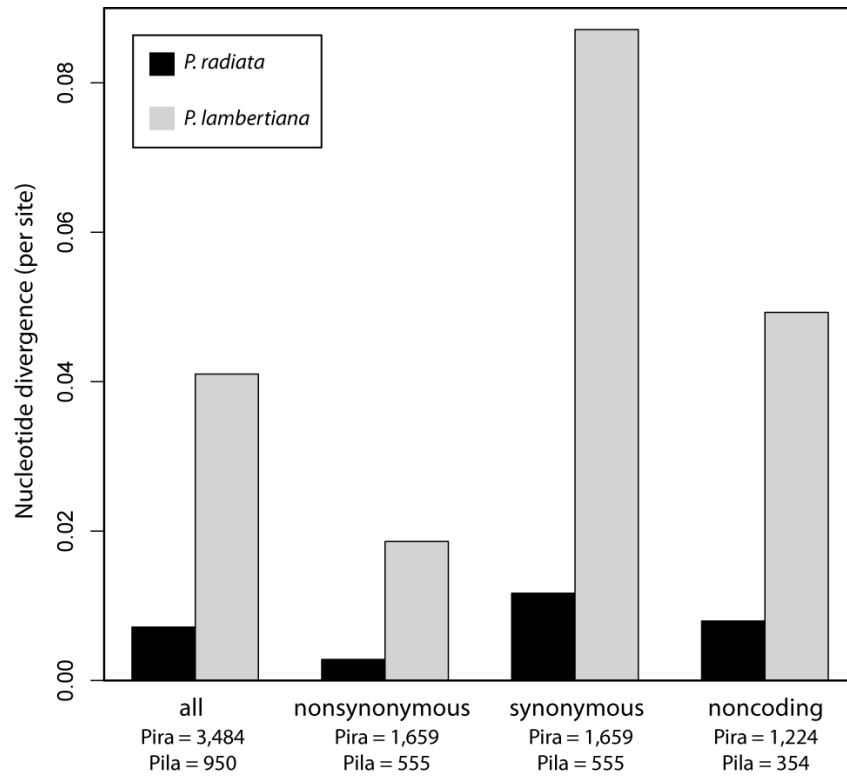

**Figure S11** Average nucleotide divergence ( $D_{xy}$ ) for all and annotated amplicons for each outgroup ( $l$  = number of loci or amplicons). Averages are weighted averages using coverage classes as the weights. Pila, *Pinus lambertiana*; Pira, *Pinus radiata*.
