# Supplementary material for: The Evolutionary Genetics of the Genes Underlying Phenotypic Associations for Loblolly Pine (Pinus taeda, Pinaceae)
Source: Oxford University Press journal article supplement (doi:10.1534/genetics.113.157198), 2013-10-12
Supplement: figures12.pdf [file figures12.pdf]

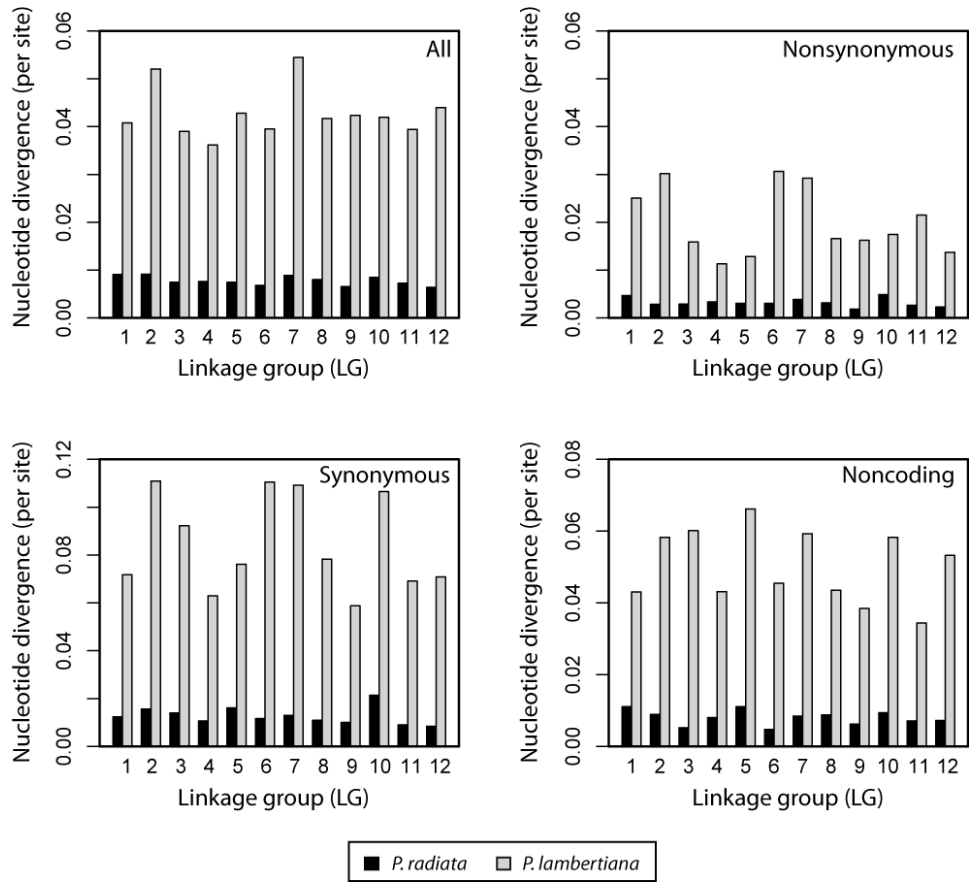

**Figure S12** Average nucleotide divergence ( $D_{xy}$ ) for all and annotated amplicons across linkage groups. Averages are weighted averages using coverage classes as the weights.
