# Supplementary material for: The Evolutionary Genetics of the Genes Underlying Phenotypic Associations for Loblolly Pine (Pinus taeda, Pinaceae)
Source: Oxford University Press journal article supplement (doi:10.1534/genetics.113.157198), 2013-10-12
Supplement: figures14.pdf [file figures14.pdf]

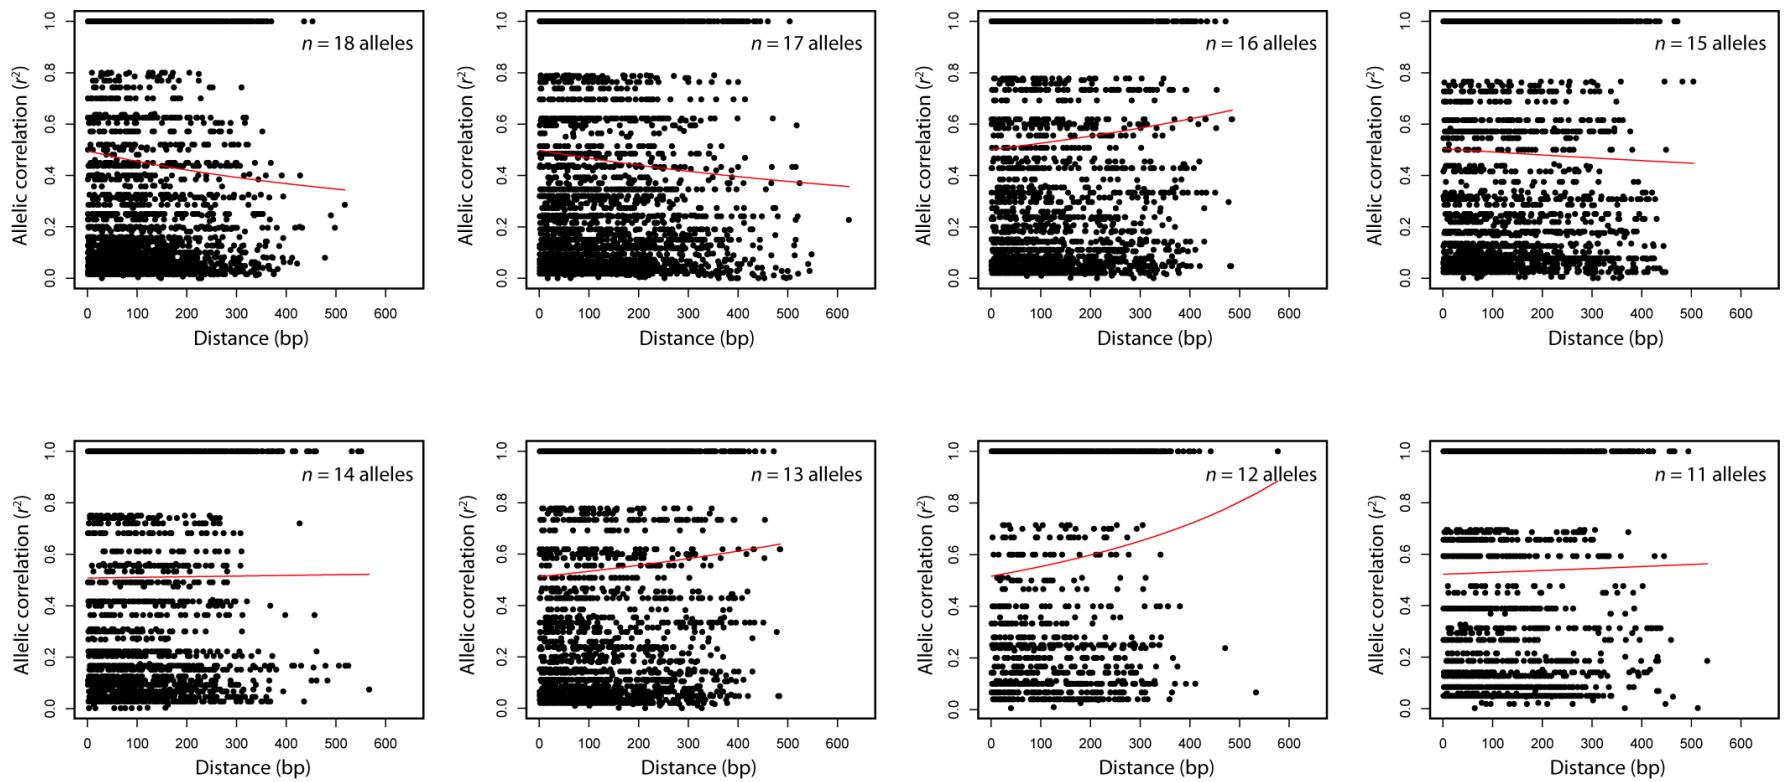

**Figure S14** decay of linkage disequilibrium, as measured using pairwise allelic correlations ( $r^2$ ), with physical distance (bp) across coverage classes as estimated with data excluding singletons. Red lines give the expected value of  $r^2$  following Remington *et al.* (2001). Intragenic pairs of SNPs were pooled across amplicons.
