# Supplementary material for: The Evolutionary Genetics of the Genes Underlying Phenotypic Associations for Loblolly Pine (Pinus taeda, Pinaceae)
Source: Oxford University Press journal article supplement (doi:10.1534/genetics.113.157198), 2013-10-12
Supplement: figures15.pdf [file figures15.pdf]

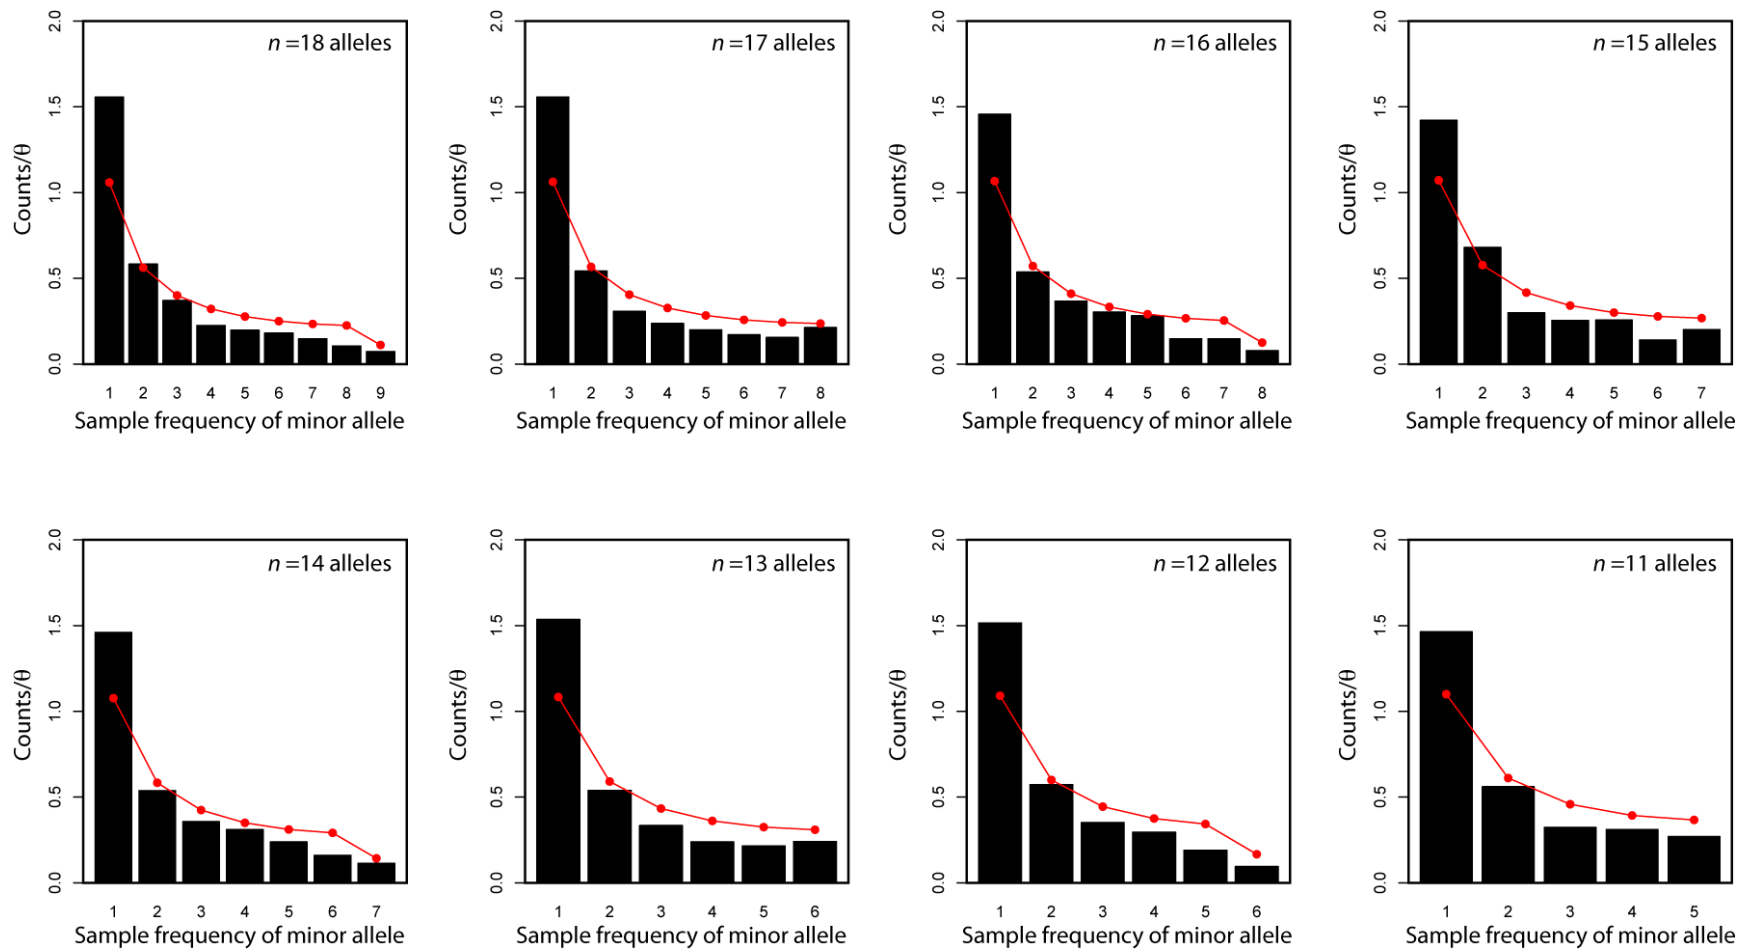

**Figure S15** Observed (black bars) and expected (red points and lines) folded site-frequency spectra for sample coverage classes from 11 to 18 sampled alleles. Counts were standardized by  $\theta$  for ease of comparison across sample coverage classes. Goodness-of-fit tests to the expected distribution reveal that all spectra deviate from neutral expectations (class 18:  $\chi^2 = 365.09$ ,  $P < 2.20e-16$ ; class 17:  $\chi^2 = 323.45$ ,  $P < 2.20e-16$ ; class 16:  $\chi^2 = 172.31$ ,  $P < 2.20e-16$ ; class 15:  $\chi^2 = 136.98$ ,  $P < 2.20e-16$ ; class 14:  $\chi^2 = 117.99$ ,  $P < 2.20e-16$ ; class 13:  $\chi^2 = 130.32$ ,  $P < 2.20e-16$ ; class 12:  $\chi^2 = 114.23$ ,  $P < 2.20e-16$ ; class 11:  $\chi^2 = 82.15$ ,  $P < 2.20e-16$ ). The degrees of freedom for each test are the number of bins on the x-axis minus one.
