# Supplementary material for: The Evolutionary Genetics of the Genes Underlying Phenotypic Associations for Loblolly Pine (Pinus taeda, Pinaceae)
Source: Oxford University Press journal article supplement (doi:10.1534/genetics.113.157198), 2013-10-12
Supplement: figures16.pdf [file figures16.pdf]

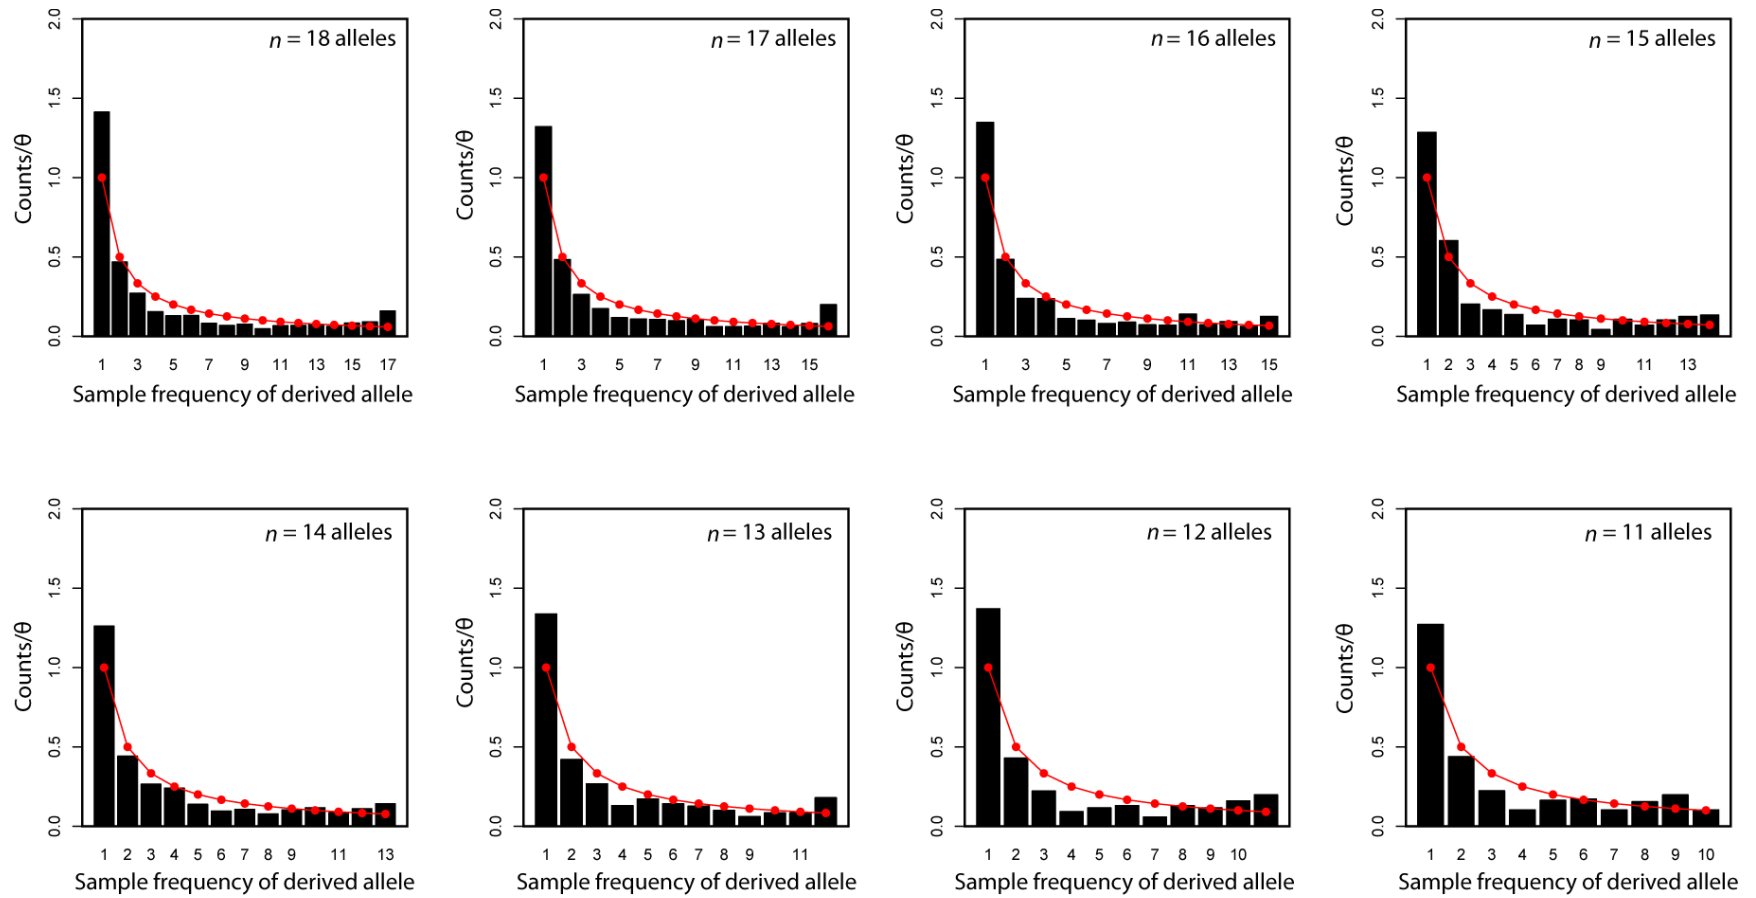

**Figure S16** Unfolded site-frequency spectra across sample coverage classes using *Pinus radiata* as the outgroup. Counts were standardized by  $\theta$  for ease of comparison across sample coverage classes. Goodness-of-fit tests to the expected distribution reveal that all spectra deviate from neutral expectations (class 18:  $\chi^2 = 392.01$ ,  $P < 2.20e-16$ ; class 17:  $\chi^2 = 381.01$ ,  $P < 2.20e-16$ ; class 16:  $\chi^2 = 175.17$ ,  $P < 2.20e-16$ ; class 15:  $\chi^2 = 134.08$ ,  $P < 2.20e-16$ ; class 14:  $\chi^2 = 65.87$ ,  $P = 1.88e-09$ ; class 13:  $\chi^2 = 91.33$ ,  $P = 9.13e-15$ ; class 12:  $\chi^2 = 111.84$ ,  $P < 2.20e-16$ ; class 11:  $\chi^2 = 34.49$ ,  $P = 7.32e-05$ ). The degrees of freedom for each test are the number of bins on the x-axis minus one.
