# Supplementary material for: The Evolutionary Genetics of the Genes Underlying Phenotypic Associations for Loblolly Pine (Pinus taeda, Pinaceae)
Source: Oxford University Press journal article supplement (doi:10.1534/genetics.113.157198), 2013-10-12
Supplement: figures17.pdf [file figures17.pdf]

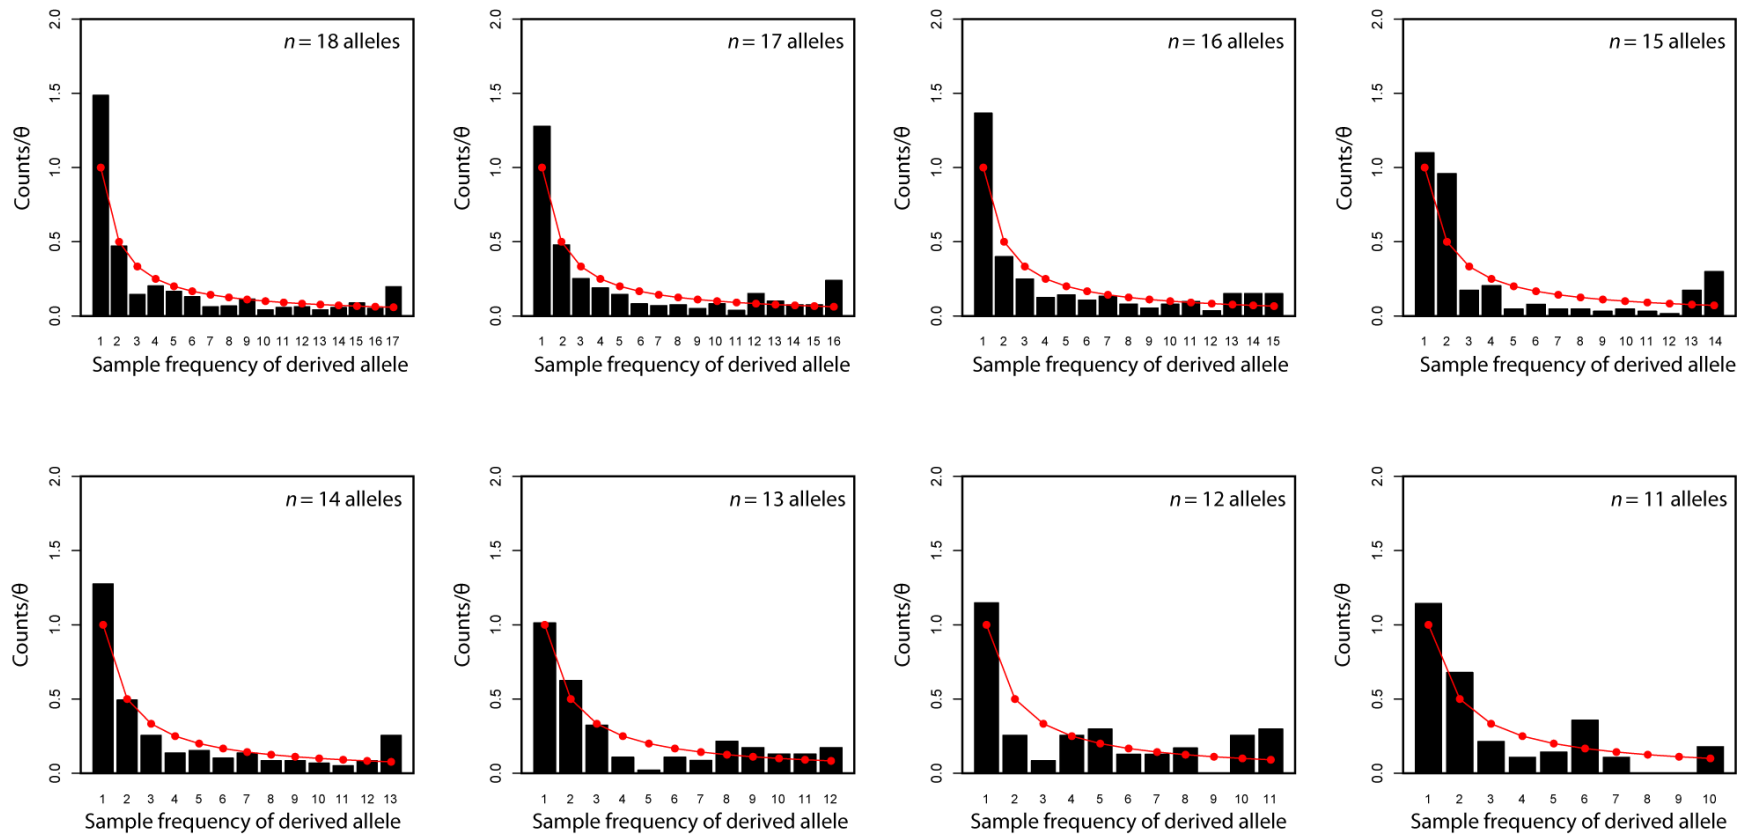

**Figure S17** Unfolded site-frequency spectra across sample coverage classes using *Pinus lambertiana* as the outgroup. Counts were standardized by  $\theta$  for ease of comparison across sample coverage classes. Goodness-of-fit tests to the expected distribution reveal that all spectra deviate from neutral expectations (class 18:  $\chi^2 = 163.05$ ,  $P < 2.20e-16$ ; class 17:  $\chi^2 = 136.63$ ,  $P < 2.20e-16$ ; class 16:  $\chi^2 = 70.18$ ,  $P = 1.79e-09$ ; class 15:  $\chi^2 = 115.33$ ,  $P < 2.20e-16$ ; class 14:  $\chi^2 = 37.75$ ,  $P = 1.68e-4$ ; class 13:  $\chi^2 = 24.80$ ,  $P = 9.75e-3$ ; class 12:  $\chi^2 = 28.78$ ,  $P = 1.35e-03$ ; class 11:  $\chi^2 = 20.98$ ,  $P = 0.01$ ). The degrees of freedom for each test are the number of bins on the x-axis minus one.
