# Supplementary material for: The Evolutionary Genetics of the Genes Underlying Phenotypic Associations for Loblolly Pine (Pinus taeda, Pinaceae)
Source: Oxford University Press journal article supplement (doi:10.1534/genetics.113.157198), 2013-10-12
Supplement: figures19.pdf [file figures19.pdf]

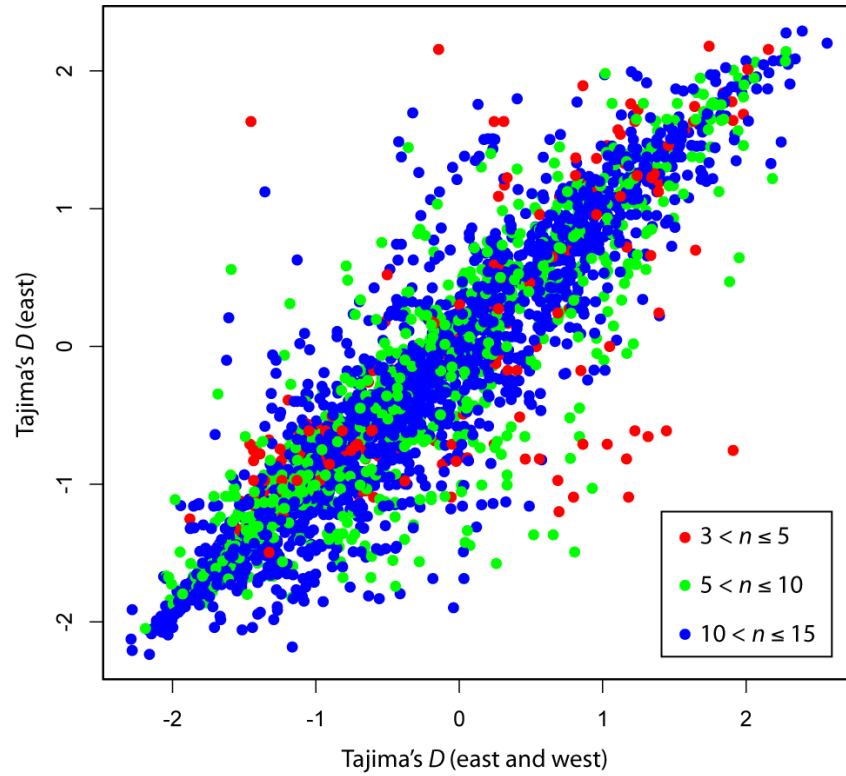

**Figure S19** Summary statistics of the site-frequency spectrum are correlated between the full sample set and the sample set trimmed to just samples obtained from east of the Mississippi River. Colors denote bins of sample coverage classes. The overall correlation structure does not differ among the three classes of sample coverage (ANCOVA:  $F = 1.27$ ,  $df_1 = 2$ ,  $df_2 = 3,129$ ,  $P = 0.28$ ,  $P_{\text{perm}} = 0.32$ ). This suggests that fitting the three-epoch model (TEM) of Ersöz *et al.* (2010) to the full data set, which includes samples from west of the Mississippi River, is likely appropriate.
