# Supplementary material for: The Evolutionary Genetics of the Genes Underlying Phenotypic Associations for Loblolly Pine (Pinus taeda, Pinaceae)
Source: Oxford University Press journal article supplement (doi:10.1534/genetics.113.157198), 2013-10-12
Supplement: figures20.pdf [file figures20.pdf]

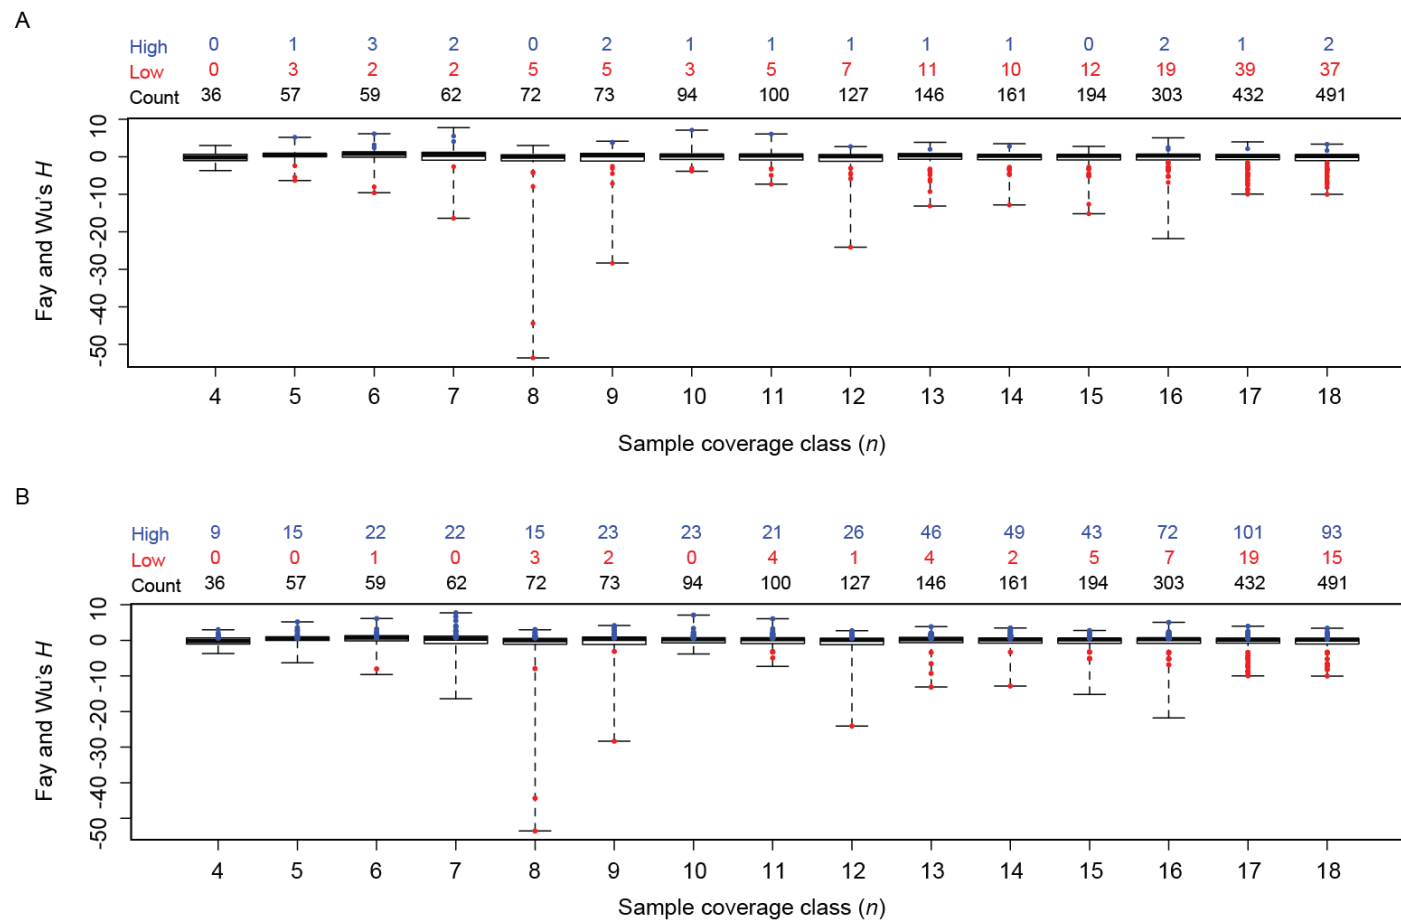

**Figure S20** Summary of Fay and Wu's  $H$  by coverage class for two neutral models – the standard neutral model (SNM) and the three-epoch model from Ersöz *et al.* (2010). Boxplots give the observed distributions across amplicons, while colored points denote outliers (red = lower tail, blue = upper tail) at the  $P = 0.05$  level. Whiskers extend to the extremes of the observed data. (A) The standard neutral model (SNM). Counts are given above this panel. (B) The three-epoch model (TEM) from Ersöz *et al.* (2010). Counts are given above this panel.
