# Supplementary material for: The Evolutionary Genetics of the Genes Underlying Phenotypic Associations for Loblolly Pine (Pinus taeda, Pinaceae)
Source: Oxford University Press journal article supplement (doi:10.1534/genetics.113.157198), 2013-10-12
Supplement: figures21.pdf [file figures21.pdf]

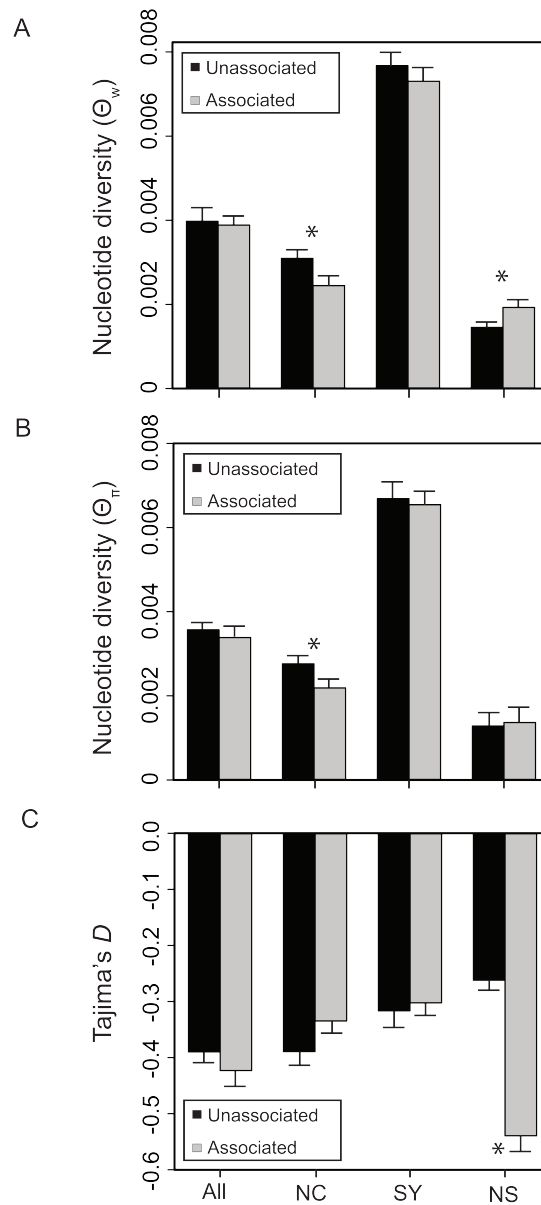

**Figure S21** Summary of differences in the site-frequency spectra for amplicons associated to at least one phenotype and those unassociated to a phenotype. Amplicons associated to at least one phenotype have too many rare variants at nonsynonymous sites, whereas they have too few rare variants at noncoding sites. This pattern causes Tajima's  $D$  to be more negative for nonsynonymous sites and less negative for noncoding sites.
