# Supplementary material for: The Evolutionary Genetics of the Genes Underlying Phenotypic Associations for Loblolly Pine (Pinus taeda, Pinaceae)
Source: Oxford University Press journal article supplement (doi:10.1534/genetics.113.157198), 2013-10-12
Supplement: files2.xlsx [file files2.xlsx]

## Sheet: Description
This workbook contains GenBank accession numbers for:
Authors:	Eckert, A. J., J. L. Wegrzyn, J. D. Liechty, J. M. Lee, W. P. Cumbie, J. M. Davis, B. Goldfarb, C. A. Loopstra, S. R. Palle, T. Quesada, C. H. Langley, and D. B. Neale.
Title:	The evolutionary genetics of the genes underlying phenotypic associations for loblolly pine (Pinus taeda, Pinaceae)
Notes:
Sample_Identifier	This column gives the nomenclature to obtain the DNA sequence deposited for a single sample.
	The identifier is composed of the following pieces:
	Amplicon identifier, which is given by the alpha-numeric code prior to the first dash.
	Sample identifier, which is given by the numeric code between the first and second dashes.
	Species identifer, which is given by the last four letters of the entire identifier (Pita = Pinus taeda, Pira = Pinus radiata, Pila = Pinus lambertiana).
GenBank_accession	This column gives the Genbank accession number for the sample listed in the Sample_Identifier column.

## Sheet: GenBank_accessions
Sample_Identifier	GenBank_Accession
0_10004_02-4022_Pita	FJ043064
0_10004_02-4023_Pita	FJ043071
0_10004_02-4024_Pita	FJ043060
0_10004_02-4025_Pita	FJ043075
0_10004_02-4026_Pita	FJ043067
0_10004_02-4027_Pita	FJ043072
0_10004_02-4028_Pita	FJ043062
0_10004_02-4029_Pita	FJ043068
0_10004_02-4030_Pita	FJ043066
0_10004_02-4031_Pita	FJ043074
0_10004_02-4032_Pita	FJ043059
0_10004_02-4033_Pita	FJ043070
0_10004_02-4034_Pita	FJ043076
0_10004_02-4035_Pita	FJ043063
0_10004_02-4036_Pita	FJ043061
0_10004_02-4037_Pita	FJ043065
0_10004_02-4038_Pita	FJ043073
0_10004_02-4039_Pita	FJ043069
0_10004_02-4040_Pira	JQ261603
0_10004_02-4041_Pila	JQ261604
0_1000_02-593_Pita	JQ015450
0_1000_02-594_Pita	JQ015449
0_10010_02-4873_Pita	FJ043086
0_10010_02-4875_Pita	FJ043087
0_10010_02-4876_Pita	FJ043082
0_10010_02-4877_Pita	FJ043078
0_10010_02-4879_Pita	FJ043077
0_10010_02-4880_Pita	FJ043080
0_10010_02-4881_Pita	FJ043085
0_10010_02-4882_Pita	FJ043079
0_10010_02-4887_Pita	FJ043081
0_10010_02-4888_Pita	FJ043083
0_10010_02-4889_Pita	FJ043084
0_10010_02-4891_Pira	JQ261605
0_10021_04-592_Pita	JQ015512
0_10021_04-595_Pita	JQ015514
0_10021_04-596_Pita	JQ015507
0_10021_04-597_Pita	JQ015516
0_10021_04-598_Pita	JQ015510
0_10021_04-599_Pita	JQ015506
0_10021_04-601_Pita	JQ015513
0_10021_04-602_Pita	JQ015518
0_10021_04-603_Pita	JQ015508
0_10021_04-604_Pita	JQ015509
0_10021_04-605_Pita	JQ015517
0_10021_04-606_Pita	JQ015515
0_10021_04-607_Pita	JQ015511
0_10021_04-608_Pita	JQ015504
0_10021_04-609_Pita	JQ015505
0_10037_01-4713_Pita	FJ043122
0_10037_01-4714_Pita	FJ043106
0_10037_01-4715_Pita	FJ043111
0_10037_01-4716_Pita	FJ043119
0_10037_01-4719_Pita	FJ043116
0_10037_01-4720_Pita	FJ043108
0_10037_01-4721_Pita	FJ043115
0_10037_01-4723_Pita	FJ043109
0_10037_01-4724_Pita	FJ043110
0_10037_01-4726_Pita	FJ043118
0_10037_01-4727_Pita	FJ043114
0_10040_02-2337_Pita	FJ043126
0_10044_01-1236_Pita	FJ043142
0_10044_01-1239_Pita	FJ043148
0_10044_01-1240_Pita	FJ043152
0_10044_01-1241_Pita	FJ043151
0_10044_01-1244_Pita	FJ043154
0_10044_01-1246_Pita	FJ043143
0_10044_01-1247_Pita	FJ043146
0_10044_01-1248_Pita	FJ043157
0_10044_01-1249_Pita	FJ043150
0_10044_01-1250_Pita	FJ043158
0_10044_01-1253_Pita	FJ043145
0_10048_01-4758_Pita	FJ043174
0_10048_01-4759_Pita	FJ043166
0_10048_01-4760_Pita	FJ043168
0_10048_01-4761_Pita	FJ043162
0_10048_01-4762_Pita	FJ043176
0_10048_01-4763_Pita	FJ043170
0_10048_01-4764_Pita	FJ043160
0_10048_01-4765_Pita	FJ043169
0_10048_01-4766_Pita	FJ043164
0_10048_01-4767_Pita	FJ043163
0_10048_01-4768_Pita	FJ043171
0_10048_01-4769_Pita	FJ043165
0_10048_01-4770_Pita	FJ043172
0_10048_01-4771_Pita	FJ043161
0_10048_01-4772_Pita	FJ043167
0_10048_01-4773_Pita	FJ043175
0_10048_01-4774_Pita	FJ043159
0_10048_01-4775_Pita	FJ043173
0_10048_01-4776_Pira	JQ261606
0_10051_02-4804_Pita	FJ043221
0_10051_02-4806_Pita	FJ043215
0_10051_02-4807_Pita	FJ043217
0_10051_02-4810_Pita	FJ043206
0_10051_02-4811_Pita	FJ043216
0_10051_02-4812_Pita	FJ043218
0_10051_02-4813_Pita	FJ043209
0_10051_02-4816_Pita	FJ043213
0_10051_02-4817_Pita	FJ043219
0_10051_02-4818_Pita	FJ043208
0_10051_02-4819_Pita	FJ043211
0_10051_02-4820_Pita	FJ043223
0_10051_02-4821_Pita	FJ043214
0_10054_01-10061_Pila	JQ261608
0_10054_01-4667_Pita	FJ043240
0_10054_01-4668_Pita	FJ043228
0_10054_01-4669_Pita	FJ043241
0_10054_01-4670_Pita	FJ043238
0_10054_01-4671_Pita	FJ043227
0_10054_01-4672_Pita	FJ043232
0_10054_01-4673_Pita	FJ043234
0_10054_01-4675_Pita	FJ043233
0_10054_01-4676_Pita	FJ043229
0_10054_01-4677_Pita	FJ043230
0_10054_01-4678_Pita	FJ043225
0_10054_01-4679_Pita	FJ043237
0_10054_01-4681_Pita	FJ043224
0_10054_01-4682_Pita	FJ043226
0_10054_01-4683_Pita	FJ043236
0_10054_01-9954_Pira	JQ261607
0_10060_03-5454_Pita	JQ664130
0_10060_03-5455_Pita	HE799710
0_10060_03-5456_Pita	JQ664123
0_10060_03-5458_Pita	JQ664119
0_10060_03-5459_Pita	JQ664118
0_10060_03-5460_Pita	JQ664121
0_10060_03-5462_Pita	JQ664128
0_10060_03-5463_Pita	JQ664122
0_10060_03-5464_Pita	JQ664124
0_10060_03-5465_Pita	JQ664129
0_10060_03-5466_Pita	JQ664125
0_10060_03-5467_Pita	JQ664120
0_10060_03-5468_Pita	JQ664126
0_10060_03-5469_Pita	JQ664127
0_10060_03-5471_Pira	JQ664131
0_10062_01-1536_Pita	FJ043269
0_10062_01-1538_Pita	FJ043270
0_10062_01-1541_Pita	FJ043271
0_10062_01-1545_Pita	FJ043273
0_10062_01-1552_Pita	FJ043260
0_10062_01-1553_Pira	JQ261609
0_10067_03-6098_Pita	FJ043286
0_10067_03-6099_Pita	FJ043288
0_10067_03-6100_Pita	FJ043293
0_10067_03-6101_Pita	FJ043283
0_10067_03-6102_Pita	FJ043285
0_10067_03-6103_Pita	FJ043294
0_10067_03-6106_Pita	FJ043291
0_10067_03-6108_Pita	FJ043278
0_10067_03-6109_Pita	FJ043281
0_10067_03-6111_Pita	FJ043290
0_10067_03-6112_Pita	FJ043284
0_10067_03-6115_Pira	HE799712
0_10112_01-11487_Pila	JQ261610
0_10112_01-11657_Pira	JQ261611
0_10112_01-5939_Pita	FJ043333
0_10112_01-5941_Pita	FJ043347
0_10112_01-5944_Pita	FJ043332
0_10112_01-5945_Pita	FJ043345
0_10112_01-5946_Pita	FJ043337
0_10112_01-5947_Pita	FJ043340
0_10112_01-5948_Pita	FJ043343
0_10112_01-5949_Pita	FJ043334
0_10112_01-5950_Pita	FJ043341
0_10112_01-5951_Pita	FJ043335
0_10112_01-5952_Pita	FJ043344
0_10112_01-5953_Pita	FJ043338
0_10113_01-5730_Pita	FJ043364
0_10113_01-5731_Pita	FJ043360
0_10113_01-5732_Pita	FJ043355
0_10113_01-5733_Pita	FJ043353
0_10113_01-5734_Pita	FJ043359
0_10113_01-5735_Pita	FJ043362
0_10113_01-5736_Pita	FJ043358
0_10113_01-5737_Pita	FJ043351
0_10113_01-5738_Pita	FJ043348
0_10113_01-5739_Pita	FJ043356
0_10113_01-5741_Pita	FJ043357
0_10113_01-5743_Pita	FJ043352
0_10113_01-5744_Pita	FJ043354
0_10113_01-5745_Pita	FJ043350
0_10113_01-5746_Pita	FJ043349
0_10116_01-615_Pita	JQ015521
0_10116_01-616_Pita	JQ015527
0_10116_01-619_Pita	JQ015529
0_10116_01-620_Pita	JQ015525
0_10116_01-621_Pita	JQ015528
0_10116_01-622_Pita	JQ015522
0_10116_01-624_Pita	JQ015524
0_10116_01-625_Pita	JQ015523
0_10116_01-627_Pita	JQ015520
0_10116_01-632_Pita	JQ015526
0_10129_01-4943_Pita	FJ043379
0_10129_01-4954_Pita	FJ043372
0_10129_01-4958_Pita	FJ043371
0_10151_01-4735_Pita	FJ043396
0_10151_01-4736_Pita	FJ043386
0_10151_01-4737_Pita	FJ043384
0_10151_01-4738_Pita	FJ043385
0_10151_01-4739_Pita	FJ043387
0_10151_01-4740_Pita	FJ043381
0_10151_01-4741_Pita	FJ043394
0_10151_01-4742_Pita	FJ043382
0_10151_01-4743_Pita	FJ043391
0_10151_01-4744_Pita	FJ043389
0_10151_01-4745_Pita	FJ043393
0_10151_01-4746_Pita	FJ043395
0_10151_01-4747_Pita	FJ043388
0_10151_01-4748_Pita	FJ043397
0_10151_01-4749_Pita	FJ043398
0_10151_01-4750_Pita	FJ043390
0_10151_01-4751_Pita	FJ043392
0_10151_01-4752_Pita	FJ043383
0_10151_01-4753_Pira	JQ261612
0_10151_01-4754_Pila	JQ261613
0_10154_01-5080_Pita	FJ043416
0_10154_01-5081_Pita	FJ043404
0_10154_01-5082_Pita	FJ043407
0_10154_01-5083_Pita	FJ043399
0_10154_01-5085_Pita	FJ043406
0_10154_01-5086_Pita	FJ043413
0_10154_01-5088_Pita	FJ043411
0_10154_01-5089_Pita	FJ043401
0_10154_01-5090_Pita	FJ043402
0_10154_01-5091_Pita	FJ043405
0_10154_01-5092_Pita	FJ043408
0_10154_01-5093_Pita	FJ043409
0_10154_01-5094_Pita	FJ043414
0_10154_01-5095_Pita	FJ043410
0_10154_01-5096_Pita	FJ043403
0_10154_01-5097_Pita	FJ043400
0_10154_01-5098_Pira	JQ261614
0_10164_01-3976_Pita	JQ015530
0_10167_01-10059_Pila	JQ261616
0_10167_01-4758_Pita	FJ043434
0_10167_01-4759_Pita	FJ043435
0_10167_01-4760_Pita	FJ043441
0_10167_01-4761_Pita	FJ043449
0_10167_01-4762_Pita	FJ043448
0_10167_01-4763_Pita	FJ043446
0_10167_01-4764_Pita	FJ043445
0_10167_01-4765_Pita	FJ043442
0_10167_01-4766_Pita	FJ043443
0_10167_01-4768_Pita	FJ043440
0_10167_01-4769_Pita	FJ043437
0_10167_01-4770_Pita	FJ043444
0_10167_01-4771_Pita	FJ043438
0_10167_01-4772_Pita	FJ043447
0_10167_01-4773_Pita	FJ043433
0_10167_01-4774_Pita	FJ043436
0_10167_01-9953_Pira	JQ261615
0_10171_01-5959_Pita	FJ043455
0_10171_01-5960_Pita	FJ043452
0_10171_01-5961_Pita	FJ043459
0_10171_01-5962_Pita	FJ043451
0_10171_01-5964_Pita	FJ043460
0_10171_01-5969_Pita	FJ043454
0_10171_01-5971_Pita	FJ043463
0_10171_01-5973_Pita	FJ043458
0_10171_01-5975_Pita	FJ043464
0_10171_01-5976_Pita	FJ043456
0_10171_01-5977_Pira	JQ261617
0_10195_01-5103_Pita	FJ043471
0_10195_01-5104_Pita	FJ043473
0_10195_01-5105_Pita	FJ043469
0_10195_01-5106_Pita	FJ043477
0_10195_01-5107_Pita	FJ043480
0_10195_01-5108_Pita	FJ043465
0_10195_01-5109_Pita	FJ043476
0_10195_01-5110_Pita	FJ043466
0_10195_01-5111_Pita	FJ043470
0_10195_01-5112_Pita	FJ043479
0_10195_01-5114_Pita	FJ043481
0_10195_01-5115_Pita	FJ043475
0_10195_01-5116_Pita	FJ043467
0_10195_01-5117_Pita	FJ043474
0_10195_01-5118_Pita	FJ043478
0_10195_01-5119_Pita	FJ043468
0_10195_01-5120_Pita	FJ043472
0_10195_01-5121_Pira	JQ261618
0_10195_01-5122_Pila	JQ261619
0_10210_01-4598_Pita	FJ043523
0_10210_01-4599_Pita	FJ043530
0_10210_01-4606_Pita	FJ043532
0_10210_01-4607_Pita	FJ043529
0_10210_01-4610_Pita	FJ043520
0_10210_01-4611_Pita	FJ043519
0_10210_01-4612_Pita	FJ043521
0_10210_01-4613_Pita	FJ043524
0_10210_01-4614_Pita	FJ043526
0_1022_02-5984_Pita	FJ043535
0_1022_02-5985_Pita	FJ043537
0_1022_02-5987_Pita	FJ043536
0_1022_02-5989_Pita	FJ043541
0_1022_02-5990_Pita	FJ043539
0_1022_02-5991_Pita	FJ043534
0_1022_02-5993_Pita	FJ043538
0_1022_02-5994_Pita	FJ043533
0_1022_02-5995_Pita	FJ043540
0_10240_01-5752_Pita	FJ043555
0_10240_01-5753_Pita	FJ043557
0_10240_01-5756_Pita	FJ043550
0_10240_01-5757_Pita	FJ043542
0_10240_01-5765_Pita	FJ043551
0_10240_01-5766_Pita	FJ043556
0_10240_01-5767_Pita	FJ043552
0_10245_01-1582_Pita	FJ043590
0_10245_01-1586_Pita	FJ043575
0_10245_01-1590_Pita	FJ043574
0_10245_01-1596_Pita	FJ043576
0_10245_01-1600_Pila	JQ261620
0_1025_01-4786_Pita	JQ015452
0_1025_01-4792_Pita	JQ015453
0_1025_01-4793_Pita	JQ015454
0_1025_01-4798_Pita	JQ015451
0_10267_01-6097_Pita	FJ043621
0_10267_01-6098_Pita	FJ043623
0_10267_01-6099_Pita	FJ043615
0_10267_01-6100_Pita	FJ043619
0_10267_01-6101_Pita	FJ043624
0_10267_01-6102_Pita	FJ043625
0_10267_01-6103_Pita	FJ043610
0_10267_01-6104_Pita	FJ043613
0_10267_01-6106_Pita	FJ043620
0_10267_01-6107_Pita	FJ043626
0_10267_01-6108_Pita	FJ043611
0_10267_01-6109_Pita	FJ043612
0_10267_01-6111_Pita	FJ043627
0_10267_01-6112_Pita	FJ043616
0_10267_01-6113_Pita	FJ043618
0_10267_01-6114_Pita	FJ043622
0_10267_01-6115_Pira	JQ261621
0_10267_01-6116_Pila	JQ261622
0_10279_01-5128_Pita	FJ043662
0_10279_01-5133_Pita	FJ043653
0_10279_01-5134_Pita	FJ043652
0_10279_01-5135_Pita	FJ043655
0_10279_01-5139_Pita	FJ043649
0_10279_01-5140_Pita	FJ043661
0_10279_01-5141_Pita	FJ043659
0_10279_01-5142_Pita	FJ043651
0_10279_01-5143_Pita	FJ043658
0_10279_01-5144_Pira	JQ261623
0_10281_01-593_Pita	JQ015542
0_10281_01-594_Pita	JQ015544
0_10281_01-595_Pita	JQ015535
0_10281_01-596_Pita	JQ015534
0_10281_01-597_Pita	JQ015536
0_10281_01-598_Pita	JQ015543
0_10281_01-600_Pita	JQ015538
0_10281_01-601_Pita	JQ015532
0_10281_01-602_Pita	JQ015541
0_10281_01-603_Pita	JQ015545
0_10281_01-604_Pita	JQ015539
0_10281_01-605_Pita	JQ015533
0_10281_01-606_Pita	JQ015540
0_10281_01-609_Pita	JQ015537
0_1028_01-5775_Pita	FJ043678
0_1028_01-5776_Pita	FJ043666
0_1028_01-5777_Pita	FJ043674
0_1028_01-5778_Pita	FJ043676
0_1028_01-5779_Pita	FJ043670
0_1028_01-5780_Pita	FJ043665
0_1028_01-5781_Pita	FJ043673
0_1028_01-5782_Pita	FJ043677
0_1028_01-5783_Pita	FJ043667
0_1028_01-5784_Pita	FJ043675
0_1028_01-5785_Pita	FJ043664
0_1028_01-5786_Pita	FJ043680
0_1028_01-5787_Pita	FJ043668
0_1028_01-5788_Pita	FJ043669
0_1028_01-5789_Pita	FJ043663
0_1028_01-5790_Pita	FJ043672
0_1028_01-5791_Pita	FJ043671
0_1028_01-5792_Pita	FJ043679
0_1028_01-5793_Pira	JQ260959
0_10295_01-4628_Pita	FJ043692
0_10295_01-4635_Pita	FJ043688
0_1031_01-4850_Pita	FJ043736
0_1031_01-4851_Pita	FJ043739
0_1031_01-4852_Pita	FJ043744
0_1031_01-4853_Pita	FJ043737
0_1031_01-4854_Pita	FJ043743
0_1031_01-4855_Pita	FJ043746
0_1031_01-4858_Pita	FJ043742
0_1031_01-4859_Pita	FJ043741
0_1031_01-4860_Pita	FJ043747
0_1031_01-4862_Pita	FJ043748
0_1031_01-4864_Pita	FJ043740
0_1031_01-4865_Pita	FJ043733
0_1031_01-4866_Pita	FJ043735
0_10331_01-4643_Pita	JQ015555
0_10331_01-4644_Pita	JQ015550
0_10331_01-4645_Pita	JQ015549
0_10331_01-4646_Pita	JQ015558
0_10331_01-4647_Pita	JQ015553
0_10331_01-4649_Pita	JQ015557
0_10331_01-4650_Pita	JQ015554
0_10331_01-4651_Pita	JQ015561
0_10331_01-4652_Pita	JQ015562
0_10331_01-4653_Pita	JQ015548
0_10331_01-4654_Pita	JQ015551
0_10331_01-4656_Pita	JQ015556
0_10331_01-4657_Pita	JQ015552
0_10331_01-4658_Pita	JQ015547
0_10331_01-4659_Pita	JQ015559
0_10331_01-4660_Pita	JQ015560
0_10333_03-5913_Pita	FJ043757
0_10333_03-5914_Pita	FJ043762
0_10333_03-5915_Pita	FJ043763
0_10333_03-5916_Pita	FJ043761
0_10333_03-5917_Pita	FJ043765
0_10333_03-5918_Pita	FJ043750
0_10333_03-5919_Pita	FJ043755
0_10333_03-5920_Pita	FJ043760
0_10333_03-5921_Pita	FJ043754
0_10333_03-5922_Pita	FJ043764
0_10333_03-5923_Pita	FJ043759
0_10333_03-5924_Pita	FJ043756
0_10333_03-5925_Pita	FJ043749
0_10333_03-5926_Pita	FJ043758
0_10333_03-5927_Pita	FJ043766
0_10333_03-5928_Pita	FJ043752
0_10333_03-5929_Pita	FJ043753
0_10333_03-5930_Pita	FJ043751
0_10340_02-5388_Pita	FJ043775
0_10340_02-5390_Pita	FJ043773
0_10340_02-5392_Pita	FJ043783
0_10340_02-5393_Pita	FJ043782
0_10340_02-5396_Pita	FJ043772
0_10340_02-5398_Pita	FJ043778
0_10340_02-5399_Pita	FJ043776
0_10340_02-5400_Pita	FJ043771
0_10340_02-5402_Pira	HE799714
0_1034_01-1679_Pita	FJ043792
0_1034_01-1683_Pita	FJ043788
0_1034_01-1685_Pita	FJ043796
0_1034_01-1687_Pita	FJ043793
0_1034_01-1688_Pita	FJ043790
0_10360_01-4022_Pita	FJ043800
0_10360_01-4023_Pita	FJ043808
0_10360_01-4024_Pita	FJ043813
0_10360_01-4025_Pita	FJ043803
0_10360_01-4026_Pita	FJ043806
0_10360_01-4027_Pita	FJ043814
0_10360_01-4028_Pita	FJ043805
0_10360_01-4029_Pita	FJ043804
0_10360_01-4030_Pita	FJ043810
0_10360_01-4031_Pita	FJ043802
0_10360_01-4032_Pita	FJ043812
0_10360_01-4033_Pita	FJ043798
0_10360_01-4034_Pita	FJ043799
0_10360_01-4035_Pita	FJ043801
0_10360_01-4036_Pita	FJ043807
0_10360_01-4037_Pita	FJ043809
0_10360_01-4038_Pita	FJ043811
0_10360_01-4039_Pita	FJ043797
0_10360_01-4040_Pira	JQ261624
0_10360_01-4041_Pila	JQ261625
0_10370_01-5941_Pita	FJ043836
0_10370_01-5943_Pita	FJ043834
0_10370_01-5946_Pita	FJ043839
0_10370_01-5949_Pita	FJ043838
0_10370_01-5950_Pita	FJ043835
0_10370_01-5954_Pira	JQ261626
0_10374_01-4713_Pita	JQ015566
0_10374_01-4714_Pita	JQ015568
0_10374_01-4715_Pita	JQ015564
0_10374_01-4720_Pita	JQ015567
0_10374_01-4722_Pita	JQ015565
0_10374_01-4723_Pita	JQ015569
0_10383_03-616_Pita	JQ015580
0_10383_03-618_Pita	JQ015571
0_10383_03-619_Pita	JQ015573
0_10383_03-621_Pita	JQ015574
0_10383_03-624_Pita	JQ015576
0_10383_03-625_Pita	JQ015570
0_10383_03-627_Pita	JQ015578
0_10383_03-629_Pita	JQ015575
0_10383_03-630_Pita	JQ015572
0_10383_03-631_Pita	JQ015577
0_10383_03-632_Pita	JQ015579
0_10384_02-1282_Pita	FJ043883
0_10384_02-1290_Pita	FJ043885
0_10384_02-1291_Pita	FJ043889
0_10384_02-1299_Pita	FJ043882
0_10384_02-13452_Pira	JQ261627
0_10399_01-639_Pita	JQ015581
0_10399_01-645_Pita	JQ015583
0_10399_01-649_Pita	JQ015584
0_10399_01-650_Pita	JQ015582
0_10399_01-651_Pita	JQ015586
0_10399_01-652_Pita	JQ015585
0_10401_01-5959_Pita	FJ043894
0_10401_01-5960_Pita	FJ043908
0_10401_01-5961_Pita	FJ043901
0_10401_01-5962_Pita	FJ043897
0_10401_01-5963_Pita	FJ043899
0_10401_01-5964_Pita	FJ043907
0_10401_01-5965_Pita	FJ043892
0_10401_01-5966_Pita	FJ043891
0_10401_01-5967_Pita	FJ043896
0_10401_01-5968_Pita	FJ043898
0_10401_01-5969_Pita	FJ043906
0_10401_01-5970_Pita	FJ043893
0_10401_01-5971_Pita	FJ043904
0_10401_01-5972_Pita	FJ043902
0_10401_01-5973_Pita	FJ043903
0_10401_01-5974_Pita	FJ043900
0_10401_01-5975_Pita	FJ043905
0_10401_01-5976_Pita	FJ043895
0_10401_01-5977_Pira	JQ261628
0_10403_01-5982_Pita	FJ043915
0_10403_01-5987_Pita	FJ043912
0_10403_01-5995_Pita	FJ043911
0_10403_01-5999_Pita	FJ043913
0_10410_01-4600_Pita	JQ015589
0_10410_01-4601_Pita	JQ015590
0_10410_01-4605_Pita	JQ015588
0_10410_01-4612_Pita	JQ015591
0_10413_02-4666_Pita	FJ043919
0_10413_02-4667_Pita	FJ043922
0_10413_02-4668_Pita	FJ043921
0_10413_02-4669_Pita	FJ043918
0_10413_02-4673_Pita	FJ043920
0_10413_02-4674_Pita	FJ043924
0_10413_02-4675_Pita	FJ043923
0_10413_02-4678_Pita	FJ043925
0_10413_02-4679_Pita	FJ043927
0_10413_02-4682_Pita	FJ043929
0_10413_02-4683_Pita	FJ043926
0_10415_01-5149_Pita	FJ043932
0_10415_01-5150_Pita	FJ043942
0_10415_01-5151_Pita	FJ043930
0_10415_01-5152_Pita	FJ043941
0_10415_01-5153_Pita	FJ043935
0_10415_01-5154_Pita	FJ043933
0_10415_01-5155_Pita	FJ043937
0_10415_01-5156_Pita	FJ043938
0_10415_01-5157_Pita	FJ043934
0_10415_01-5159_Pita	FJ043943
0_10415_01-5160_Pita	FJ043936
0_10415_01-5161_Pita	FJ043945
0_10415_01-5162_Pita	FJ043944
0_10415_01-5163_Pita	FJ043931
0_10415_01-5164_Pita	FJ043940
0_10415_01-5166_Pita	FJ043946
0_10415_01-5167_Pira	JQ261629
0_10429_01-4551_Pita	FJ043957
0_10429_01-4552_Pita	FJ043948
0_10429_01-4554_Pita	FJ043951
0_10429_01-4555_Pita	FJ043949
0_10429_01-4557_Pita	FJ043947
0_10429_01-4560_Pita	FJ043954
0_10429_01-4561_Pita	FJ043960
0_10429_01-4562_Pita	FJ043961
0_10429_01-4564_Pita	FJ043958
0_10429_01-4566_Pita	FJ043950
0_10429_01-4568_Pita	FJ043955
0_10429_01-4569_Pira	JQ261630
0_10432_02-4689_Pita	FJ043974
0_10432_02-4694_Pita	FJ043973
0_10432_02-4695_Pita	FJ043966
0_10432_02-4696_Pita	FJ043969
0_10432_02-4697_Pita	FJ043964
0_10432_02-4698_Pita	FJ043968
0_10432_02-4700_Pita	FJ043963
0_10432_02-4701_Pita	FJ043971
0_10432_02-4702_Pita	FJ043965
0_10432_02-4703_Pita	FJ043972
0_10432_02-4704_Pita	FJ043967
0_10446_01-4575_Pita	FJ043999
0_10446_01-4576_Pita	FJ044006
0_10446_01-4577_Pita	FJ044003
0_10446_01-4578_Pita	FJ043994
0_10446_01-4579_Pita	FJ044004
0_10446_01-4580_Pita	FJ043995
0_10446_01-4582_Pita	FJ044009
0_10446_01-4583_Pita	FJ044001
0_10446_01-4584_Pita	FJ043996
0_10446_01-4586_Pita	FJ043997
0_10446_01-4587_Pita	FJ043993
0_10446_01-4589_Pita	FJ044000
0_10446_01-4590_Pita	FJ043998
0_10446_01-4591_Pita	FJ044002
0_10446_01-4592_Pira	JQ261631
0_10449_01-4873_Pita	FJ044021
0_10449_01-4874_Pita	FJ044026
0_10449_01-4875_Pita	FJ044019
0_10449_01-4876_Pita	FJ044025
0_10449_01-4877_Pita	FJ044027
0_10449_01-4878_Pita	FJ044013
0_10449_01-4879_Pita	FJ044020
0_10449_01-4880_Pita	FJ044011
0_10449_01-4881_Pita	FJ044010
0_10449_01-4882_Pita	FJ044017
0_10449_01-4883_Pita	FJ044014
0_10449_01-4884_Pita	FJ044016
0_10449_01-4885_Pita	FJ044024
0_10449_01-4886_Pita	FJ044015
0_10449_01-4888_Pita	FJ044012
0_10449_01-4890_Pita	FJ044018
0_10449_01-4891_Pira	JQ261632
0_10449_01-4892_Pila	JQ261633
0_10453_01-13492_Pira	JQ261634
0_10453_01-5798_Pita	FJ044044
0_10453_01-5799_Pita	FJ044034
0_10453_01-5801_Pita	FJ044037
0_10453_01-5802_Pita	FJ044042
0_10453_01-5803_Pita	FJ044030
0_10453_01-5804_Pita	FJ044029
0_10453_01-5805_Pita	FJ044043
0_10453_01-5806_Pita	FJ044031
0_10453_01-5807_Pita	FJ044040
0_10453_01-5808_Pita	FJ044032
0_10453_01-5809_Pita	FJ044038
0_10453_01-5810_Pita	FJ044028
0_10453_01-5812_Pita	FJ044035
0_10453_01-5813_Pita	FJ044039
0_10453_01-5814_Pita	FJ044033
0_10453_01-5815_Pita	FJ044045
0_10472_01-13491_Pira	JQ261635
0_10472_01-4528_Pita	FJ044064
0_10472_01-4529_Pita	FJ044060
0_10472_01-4530_Pita	FJ044062
0_10472_01-4531_Pita	FJ044057
0_10472_01-4536_Pita	FJ044067
0_10472_01-4539_Pita	FJ044058
0_10472_01-4542_Pita	FJ044070
0_10488_02-4758_Pita	FJ044080
0_10488_02-4759_Pita	FJ044074
0_10488_02-4760_Pita	FJ044082
0_10488_02-4761_Pita	FJ044083
0_10488_02-4762_Pita	FJ044090
0_10488_02-4763_Pita	FJ044079
0_10488_02-4764_Pita	FJ044075
0_10488_02-4765_Pita	FJ044091
0_10488_02-4766_Pita	FJ044077
0_10488_02-4767_Pita	FJ044087
0_10488_02-4768_Pita	FJ044085
0_10488_02-4769_Pita	FJ044076
0_10488_02-4770_Pita	FJ044081
0_10488_02-4771_Pita	FJ044088
0_10488_02-4772_Pita	FJ044089
0_10488_02-4773_Pita	FJ044084
0_10488_02-4774_Pita	FJ044086
0_10488_02-4775_Pita	FJ044078
0_10488_02-4776_Pira	JQ261636
0_10499_01-1239_Pita	FJ044094
0_10499_01-1245_Pita	FJ044102
0_10499_01-1246_Pita	FJ044098
0_10499_01-1247_Pita	FJ044100
0_10499_01-1249_Pita	FJ044093
0_10499_01-1251_Pita	FJ044092
0_10499_01-1253_Pita	FJ044099
0_10499_01-13512_Pira	JQ261637
0_10501_01-5914_Pita	FJ044112
0_10501_01-5915_Pita	FJ044119
0_10501_01-5916_Pita	FJ044116
0_10501_01-5917_Pita	FJ044114
0_10501_01-5918_Pita	FJ044120
0_10501_01-5919_Pita	FJ044108
0_10501_01-5921_Pita	FJ044109
0_10501_01-5922_Pita	FJ044111
0_10501_01-5923_Pita	FJ044105
0_10501_01-5924_Pita	FJ044107
0_10501_01-5925_Pita	FJ044110
0_10501_01-5926_Pita	FJ044104
0_10501_01-5927_Pita	FJ044117
0_10501_01-5928_Pita	FJ044106
0_10501_01-5929_Pita	FJ044118
0_10501_01-5930_Pita	FJ044121
0_10501_01-5931_Pira	JQ261638
0_10503_01-4781_Pita	FJ044135
0_10503_01-4782_Pita	FJ044132
0_10503_01-4783_Pita	FJ044122
0_10503_01-4784_Pita	FJ044138
0_10503_01-4785_Pita	FJ044134
0_10503_01-4786_Pita	FJ044125
0_10503_01-4787_Pita	FJ044124
0_10503_01-4788_Pita	FJ044133
0_10503_01-4789_Pita	FJ044130
0_10503_01-4790_Pita	FJ044131
0_10503_01-4791_Pita	FJ044136
0_10503_01-4792_Pita	FJ044137
0_10503_01-4793_Pita	FJ044128
0_10503_01-4794_Pita	FJ044129
0_10503_01-4796_Pita	FJ044126
0_10503_01-4797_Pita	FJ044127
0_10503_01-4798_Pita	FJ044123
0_10503_01-4799_Pira	JQ261639
0_10509_02-5936_Pita	FJ044150
0_10509_02-5937_Pita	FJ044144
0_10509_02-5938_Pita	FJ044152
0_10509_02-5939_Pita	FJ044139
0_10509_02-5940_Pita	FJ044146
0_10509_02-5941_Pita	FJ044148
0_10509_02-5942_Pita	FJ044145
0_10509_02-5943_Pita	FJ044156
0_10509_02-5944_Pita	FJ044142
0_10509_02-5945_Pita	FJ044140
0_10509_02-5946_Pita	FJ044151
0_10509_02-5947_Pita	FJ044149
0_10509_02-5948_Pita	FJ044153
0_10509_02-5949_Pita	FJ044143
0_10509_02-5950_Pita	FJ044147
0_10509_02-5951_Pita	FJ044141
0_10509_02-5952_Pita	FJ044155
0_10509_02-5953_Pita	FJ044154
0_10509_02-5954_Pira	JQ261640
0_1050_01-1535_Pita	FJ044157
0_1050_01-1537_Pita	FJ044164
0_1050_01-1541_Pita	FJ044166
0_1050_01-1542_Pita	FJ044169
0_1050_01-1550_Pita	FJ044171
0_10514_02-13471_Pira	JQ261641
0_10514_02-1571_Pita	FJ044185
0_10515_01-11754_Pira	JQ261642
0_10515_01-1665_Pita	FJ044198
0_10520_02-4714_Pita	JQ015592
0_10520_02-4716_Pita	JQ015595
0_10520_02-4719_Pita	JQ015594
0_10520_02-4720_Pita	JQ015593
0_10544_01-3976_Pita	JQ015606
0_10544_01-3977_Pita	JQ015600
0_10544_01-3978_Pita	JQ015607
0_10544_01-3979_Pita	JQ015604
0_10544_01-3980_Pita	JQ015603
0_10544_01-3981_Pita	JQ015612
0_10544_01-3983_Pita	JQ015611
0_10544_01-3985_Pita	JQ015609
0_10544_01-3986_Pita	JQ015602
0_10544_01-3987_Pita	JQ015598
0_10544_01-3988_Pita	JQ015601
0_10544_01-3989_Pita	JQ015599
0_10544_01-3990_Pita	JQ015597
0_10544_01-3991_Pita	JQ015610
0_10544_01-3992_Pita	JQ015605
0_10544_01-3993_Pita	JQ015608
0_10559_01-13491_Pira	JQ261643
0_10559_01-5729_Pita	FJ044242
0_10559_01-5730_Pita	FJ044247
0_10559_01-5732_Pita	FJ044249
0_10559_01-5733_Pita	FJ044237
0_10559_01-5734_Pita	FJ044251
0_10559_01-5735_Pita	FJ044236
0_10559_01-5737_Pita	FJ044235
0_10559_01-5738_Pita	FJ044245
0_10559_01-5739_Pita	FJ044248
0_10559_01-5740_Pita	FJ044243
0_10559_01-5741_Pita	FJ044252
0_10559_01-5742_Pita	FJ044250
0_10559_01-5743_Pita	FJ044246
0_10559_01-5744_Pita	FJ044239
0_10559_01-5745_Pita	FJ044241
0_10559_01-5746_Pita	FJ044244
0_1055_01-4804_Pita	FJ044259
0_1055_01-4807_Pita	FJ044270
0_1055_01-4808_Pita	FJ044265
0_1055_01-4809_Pita	FJ044260
0_1055_01-4810_Pita	FJ044253
0_1055_01-4813_Pita	FJ044257
0_1055_01-4814_Pita	FJ044258
0_1055_01-4815_Pita	FJ044255
0_1055_01-4816_Pita	FJ044267
0_1055_01-4818_Pita	FJ044264
0_1055_01-4819_Pita	FJ044263
0_1055_01-4820_Pita	FJ044266
0_1055_01-4822_Pira	JQ260960
0_10562_02-642_Pita	JQ015617
0_10562_02-643_Pita	JQ015621
0_10562_02-645_Pita	JQ015623
0_10562_02-646_Pita	JQ015616
0_10562_02-647_Pita	JQ015620
0_10562_02-648_Pita	JQ015619
0_10562_02-649_Pita	JQ015615
0_10562_02-650_Pita	JQ015624
0_10562_02-651_Pita	JQ015622
0_10562_02-652_Pita	JQ015614
0_10562_02-655_Pita	JQ015618
0_10569_01-4529_Pita	FJ044273
0_10569_01-4531_Pita	FJ044284
0_10569_01-4532_Pita	FJ044277
0_10569_01-4534_Pita	FJ044286
0_10569_01-4536_Pita	FJ044274
0_10569_01-4537_Pita	FJ044285
0_10569_01-4538_Pita	FJ044280
0_10569_01-4540_Pita	FJ044281
0_10569_01-4541_Pita	FJ044279
0_10569_01-4542_Pita	FJ044283
0_10569_01-4543_Pita	FJ044275
0_10569_01-4544_Pita	FJ044276
0_10569_01-4545_Pita	FJ044288
0_10569_01-4546_Pira	JQ261644
0_10574_01-4827_Pita	FJ044293
0_10574_01-4828_Pita	FJ044291
0_10574_01-4829_Pita	FJ044299
0_10574_01-4830_Pita	FJ044305
0_10574_01-4831_Pita	FJ044290
0_10574_01-4832_Pita	FJ044302
0_10574_01-4833_Pita	FJ044289
0_10574_01-4834_Pita	FJ044296
0_10574_01-4835_Pita	FJ044301
0_10574_01-4836_Pita	FJ044300
0_10574_01-4837_Pita	FJ044292
0_10574_01-4838_Pita	FJ044297
0_10574_01-4839_Pita	FJ044306
0_10574_01-4840_Pita	FJ044304
0_10574_01-4841_Pita	FJ044294
0_10574_01-4842_Pita	FJ044295
0_10574_01-4843_Pita	FJ044303
0_10574_01-4844_Pita	FJ044298
0_10574_01-4845_Pira	JQ261645
0_10574_01-4846_Pila	JQ261646
0_10583_01-1687_Pita	FJ044308
0_10583_01-1690_Pita	FJ044318
0_10586_01-4552_Pita	JQ015626
0_10586_01-4561_Pita	JQ015627
0_10591_01-4850_Pita	FJ044327
0_10591_01-4851_Pita	FJ044340
0_10591_01-4852_Pita	FJ044334
0_10591_01-4853_Pita	FJ044328
0_10591_01-4855_Pita	FJ044330
0_10591_01-4856_Pita	FJ044329
0_10591_01-4857_Pita	FJ044339
0_10591_01-4858_Pita	FJ044336
0_10591_01-4859_Pita	FJ044342
0_10591_01-4860_Pita	FJ044341
0_10591_01-4861_Pita	FJ044337
0_10591_01-4862_Pita	FJ044325
0_10591_01-4863_Pita	FJ044335
0_10591_01-4864_Pita	FJ044332
0_10591_01-4865_Pita	FJ044331
0_10591_01-4866_Pita	FJ044333
0_10591_01-4867_Pita	FJ044338
0_10607_01-4736_Pita	FJ044362
0_10607_01-4738_Pita	FJ044363
0_10607_01-4740_Pita	FJ044359
0_10607_01-4742_Pita	FJ044368
0_10607_01-4744_Pita	FJ044367
0_10607_01-4745_Pita	FJ044360
0_10607_01-4746_Pita	FJ044369
0_10607_01-4751_Pita	FJ044364
0_10607_01-4752_Pita	FJ044366
0_10611_01-4650_Pita	FJ044388
0_10611_01-4654_Pita	FJ044394
0_10611_01-4656_Pita	FJ044392
0_10612_02-5080_Pita	FJ044408
0_10612_02-5081_Pita	FJ044409
0_10612_02-5082_Pita	FJ044414
0_10612_02-5083_Pita	FJ044420
0_10612_02-5084_Pita	FJ044415
0_10612_02-5085_Pita	FJ044417
0_10612_02-5086_Pita	FJ044416
0_10612_02-5088_Pita	FJ044407
0_10612_02-5089_Pita	FJ044406
0_10612_02-5090_Pita	FJ044419
0_10612_02-5091_Pita	FJ044418
0_10612_02-5092_Pita	FJ044422
0_10612_02-5093_Pita	FJ044421
0_10612_02-5094_Pita	FJ044412
0_10612_02-5095_Pita	FJ044410
0_10612_02-5096_Pita	FJ044413
0_10612_02-5097_Pita	FJ044411
0_10612_02-5098_Pira	JQ261647
0_10618_01-6212_Pita	FJ044457
0_10618_01-6213_Pita	FJ044443
0_10618_01-6214_Pita	FJ044454
0_10618_01-6215_Pita	FJ044458
0_10618_01-6216_Pita	FJ044447
0_10618_01-6217_Pita	FJ044445
0_10618_01-6218_Pita	FJ044448
0_10618_01-6219_Pita	FJ044459
0_10618_01-6220_Pita	FJ044444
0_10618_01-6221_Pita	FJ044453
0_10618_01-6222_Pita	FJ044450
0_10618_01-6223_Pita	FJ044452
0_10618_01-6224_Pita	FJ044455
0_10618_01-6225_Pita	FJ044451
0_10618_01-6226_Pita	FJ044456
0_10618_01-6227_Pita	FJ044446
0_10618_01-6228_Pita	FJ044449
0_10618_01-6229_Pita	FJ044460
0_10631_01-661_Pita	JQ015636
0_10631_01-662_Pita	JQ015632
0_10631_01-663_Pita	JQ015635
0_10631_01-664_Pita	JQ015631
0_10631_01-665_Pita	JQ015637
0_10631_01-666_Pita	JQ015644
0_10631_01-667_Pita	JQ015640
0_10631_01-668_Pita	JQ015630
0_10631_01-669_Pita	JQ015643
0_10631_01-670_Pita	JQ015638
0_10631_01-671_Pita	JQ015642
0_10631_01-672_Pita	JQ015639
0_10631_01-673_Pita	JQ015634
0_10631_01-674_Pita	JQ015633
0_10631_01-675_Pita	JQ015641
0_10631_01-676_Pita	JQ015628
0_10631_01-678_Pita	JQ015629
0_10631_02-6810_Pita	FJ044464
0_10631_02-6811_Pita	FJ044469
0_10631_02-6812_Pita	FJ044473
0_10631_02-6813_Pita	FJ044470
0_10631_02-6814_Pita	FJ044461
0_10631_02-6815_Pita	FJ044474
0_10631_02-6816_Pita	FJ044477
0_10631_02-6817_Pita	FJ044467
0_10631_02-6818_Pita	FJ044466
0_10631_02-6820_Pita	FJ044465
0_10631_02-6821_Pita	FJ044471
0_10631_02-6822_Pita	FJ044472
0_10631_02-6823_Pita	FJ044476
0_10631_02-6824_Pita	FJ044478
0_10631_02-6825_Pita	FJ044468
0_10631_02-6826_Pita	FJ044462
0_10631_02-6827_Pita	FJ044463
0_10631_02-6828_Pira	JQ261648
0_10635_01-1628_Pita	FJ044483
0_10635_01-1631_Pita	FJ044494
0_10635_01-1634_Pita	FJ044487
0_10635_01-1640_Pita	FJ044491
0_10635_01-1641_Pita	FJ044489
0_1063_03-13465_Pira	JQ260961
0_1063_03-5982_Pita	FJ044503
0_1063_03-5983_Pita	FJ044509
0_1063_03-5984_Pita	FJ044513
0_1063_03-5985_Pita	FJ044512
0_1063_03-5986_Pita	FJ044499
0_1063_03-5987_Pita	FJ044510
0_1063_03-5988_Pita	FJ044505
0_1063_03-5989_Pita	FJ044506
0_1063_03-5990_Pita	FJ044508
0_1063_03-5991_Pita	FJ044504
0_1063_03-5992_Pita	FJ044500
0_1063_03-5993_Pita	FJ044507
0_1063_03-5994_Pita	FJ044496
0_1063_03-5995_Pita	FJ044501
0_1063_03-5996_Pita	FJ044497
0_1063_03-5997_Pita	FJ044502
0_1063_03-5998_Pita	FJ044511
0_1063_03-5999_Pita	FJ044498
0_10642_01-4873_Pita	FJ044523
0_10642_01-4874_Pita	FJ044517
0_10642_01-4875_Pita	FJ044524
0_10642_01-4876_Pita	FJ044528
0_10642_01-4878_Pita	FJ044526
0_10642_01-4880_Pita	FJ044519
0_10642_01-4881_Pita	FJ044522
0_10642_01-4884_Pita	FJ044518
0_10642_01-4886_Pita	FJ044516
0_10642_01-4887_Pita	FJ044525
0_10642_01-4888_Pita	FJ044529
0_10642_01-4890_Pita	FJ044527
0_10651_02-593_Pita	JQ015649
0_10651_02-594_Pita	JQ015648
0_10651_02-595_Pita	JQ015653
0_10651_02-596_Pita	JQ015651
0_10651_02-598_Pita	JQ015652
0_10651_02-601_Pita	JQ015657
0_10651_02-602_Pita	JQ015655
0_10651_02-603_Pita	JQ015656
0_10651_02-604_Pita	JQ015650
0_10651_02-605_Pita	JQ015654
0_10651_02-609_Pita	JQ015647
0_10657_01-5913_Pita	FJ044540
0_10657_01-5914_Pita	FJ044541
0_10657_01-5915_Pita	FJ044530
0_10657_01-5917_Pita	FJ044545
0_10657_01-5918_Pita	FJ044534
0_10657_01-5919_Pita	FJ044537
0_10657_01-5920_Pita	FJ044535
0_10657_01-5921_Pita	FJ044542
0_10657_01-5922_Pita	FJ044536
0_10657_01-5923_Pita	FJ044533
0_10657_01-5924_Pita	FJ044539
0_10657_01-5925_Pita	FJ044546
0_10657_01-5926_Pita	FJ044543
0_10657_01-5927_Pita	FJ044532
0_10657_01-5928_Pita	FJ044538
0_10657_01-5929_Pita	FJ044544
0_10657_01-5930_Pita	FJ044531
0_10657_01-5931_Pira	JQ261649
0_10663_01-4582_Pita	JQ015660
0_10663_01-4583_Pita	JQ015658
0_10663_01-4586_Pita	JQ015661
0_10663_01-4591_Pita	JQ015659
0_10667_02-13491_Pira	JQ261650
0_10667_02-4666_Pita	FJ044558
0_10667_02-4667_Pita	FJ044549
0_10667_02-4668_Pita	FJ044555
0_10667_02-4669_Pita	FJ044564
0_10667_02-4670_Pita	FJ044550
0_10667_02-4671_Pita	FJ044556
0_10667_02-4673_Pita	FJ044551
0_10667_02-4674_Pita	FJ044553
0_10667_02-4675_Pita	FJ044557
0_10667_02-4676_Pita	FJ044559
0_10667_02-4677_Pita	FJ044552
0_10667_02-4678_Pita	FJ044561
0_10667_02-4679_Pita	FJ044562
0_10667_02-4680_Pita	FJ044560
0_10667_02-4681_Pita	FJ044563
0_10667_02-4682_Pita	FJ044554
0_10667_02-4683_Pita	FJ044548
0_10673_01-1265_Pita	FJ044569
0_10693_01-5945_Pita	FJ044601
0_10693_01-5951_Pita	FJ044607
0_10706_01-10063_Pila	JQ261652
0_10706_01-1673_Pita	FJ044626
0_10706_01-1674_Pita	FJ044616
0_10706_01-1675_Pita	FJ044619
0_10706_01-1676_Pita	FJ044621
0_10706_01-1677_Pita	FJ044612
0_10706_01-1678_Pita	FJ044615
0_10706_01-1679_Pita	FJ044618
0_10706_01-1680_Pita	FJ044623
0_10706_01-1681_Pita	FJ044617
0_10706_01-1682_Pita	FJ044610
0_10706_01-1683_Pita	FJ044622
0_10706_01-1684_Pita	FJ044627
0_10706_01-1685_Pita	FJ044613
0_10706_01-1686_Pita	FJ044611
0_10706_01-1687_Pita	FJ044614
0_10706_01-1688_Pita	FJ044624
0_10706_01-1689_Pita	FJ044625
0_10706_01-1690_Pita	FJ044620
0_10706_01-9954_Pira	JQ261651
0_10712_02-4597_Pita	FJ044643
0_10712_02-4598_Pita	FJ044638
0_10712_02-4599_Pita	FJ044637
0_10712_02-4600_Pita	FJ044632
0_10712_02-4601_Pita	FJ044635
0_10712_02-4602_Pita	FJ044631
0_10712_02-4603_Pita	FJ044628
0_10712_02-4604_Pita	FJ044630
0_10712_02-4605_Pita	FJ044640
0_10712_02-4606_Pita	FJ044641
0_10712_02-4607_Pita	FJ044639
0_10712_02-4608_Pita	FJ044645
0_10712_02-4609_Pita	FJ044642
0_10712_02-4610_Pita	FJ044644
0_10712_02-4611_Pita	FJ044634
0_10712_02-4612_Pita	FJ044629
0_10712_02-4613_Pita	FJ044633
0_10712_02-4614_Pita	FJ044636
0_10712_02-4615_Pira	JQ261653
0_10719_01-615_Pita	JQ015667
0_10719_01-616_Pita	JQ015672
0_10719_01-617_Pita	JQ015666
0_10719_01-619_Pita	JQ015670
0_10719_01-620_Pita	JQ015665
0_10719_01-623_Pita	JQ015668
0_10719_01-624_Pita	JQ015671
0_10719_01-625_Pita	JQ015664
0_10719_01-627_Pita	JQ015662
0_10719_01-628_Pita	JQ015669
0_10719_01-629_Pita	JQ015663
0_1071_01-5960_Pita	FJ044647
0_1071_01-5965_Pita	FJ044648
0_1071_01-5967_Pita	FJ044651
0_1071_01-5971_Pita	FJ044650
0_1071_01-5975_Pita	FJ044649
0_1071_01-5976_Pita	FJ044646
0_10729_02-4781_Pita	FJ044659
0_10729_02-4782_Pita	FJ044669
0_10729_02-4783_Pita	FJ044665
0_10729_02-4784_Pita	FJ044666
0_10729_02-4785_Pita	FJ044668
0_10729_02-4786_Pita	FJ044656
0_10729_02-4787_Pita	FJ044663
0_10729_02-4788_Pita	FJ044661
0_10729_02-4789_Pita	FJ044658
0_10729_02-4790_Pita	FJ044655
0_10729_02-4791_Pita	FJ044667
0_10729_02-4792_Pita	FJ044660
0_10729_02-4793_Pita	FJ044652
0_10729_02-4795_Pita	FJ044657
0_10729_02-4796_Pita	FJ044664
0_10729_02-4798_Pita	FJ044654
0_10729_02-4799_Pira	JQ261654
0_10732_01-4530_Pita	FJ044670
0_10732_01-4532_Pita	FJ044681
0_10732_01-4536_Pita	FJ044678
0_10732_01-4537_Pita	FJ044683
0_10732_01-4541_Pita	FJ044673
0_10741_01-5775_Pita	FJ044708
0_10741_01-5776_Pita	FJ044721
0_10741_01-5777_Pita	FJ044710
0_10741_01-5778_Pita	FJ044720
0_10741_01-5779_Pita	FJ044709
0_10741_01-5780_Pita	FJ044715
0_10741_01-5781_Pita	FJ044706
0_10741_01-5784_Pita	FJ044712
0_10741_01-5785_Pita	FJ044713
0_10741_01-5786_Pita	FJ044717
0_10741_01-5787_Pita	FJ044718
0_10741_01-5789_Pita	FJ044719
0_10741_01-5790_Pita	FJ044714
0_10741_01-5791_Pita	FJ044716
0_10741_01-5792_Pita	FJ044711
0_10741_01-5793_Pira	HE799716
0_10741_01-5794_Pila	HE799718
0_10754_01-10895_Pira	JQ261655
0_10754_01-10933_Pila	JQ261656
0_10754_01-1651_Pita	FJ044734
0_10754_01-1653_Pita	FJ044724
0_10754_01-1658_Pita	FJ044733
0_10754_01-1659_Pita	FJ044730
0_10754_01-1663_Pita	FJ044725
0_10754_01-1664_Pita	FJ044739
0_10754_01-1666_Pita	FJ044723
0_10754_01-1667_Pita	FJ044728
0_10755_02-3999_Pita	JQ664036
0_10755_02-4000_Pita	JQ664035
0_10755_02-4003_Pita	JQ664033
0_10755_02-4005_Pita	JQ664037
0_10755_02-4014_Pita	JQ664034
0_10755_02-4016_Pita	HE799720
0_10755_02-4017_Pira	HE799722
0_1077_01-638_Pita	JQ015466
0_1077_01-639_Pita	JQ015464
0_1077_01-643_Pita	JQ015459
0_1077_01-645_Pita	JQ015460
0_1077_01-646_Pita	JQ015462
0_1077_01-647_Pita	JQ015457
0_1077_01-648_Pita	JQ015461
0_1077_01-649_Pita	JQ015468
0_1077_01-650_Pita	JQ015465
0_1077_01-651_Pita	JQ015456
0_1077_01-652_Pita	JQ015467
0_1077_01-654_Pita	JQ015458
0_1077_01-655_Pita	JQ015463
0_1078_01-4712_Pita	JQ015485
0_1078_01-4713_Pita	JQ015480
0_1078_01-4714_Pita	JQ015482
0_1078_01-4715_Pita	JQ015478
0_1078_01-4716_Pita	JQ015471
0_1078_01-4717_Pita	JQ015483
0_1078_01-4718_Pita	JQ015475
0_1078_01-4719_Pita	JQ015470
0_1078_01-4720_Pita	JQ015487
0_1078_01-4721_Pita	JQ015479
0_1078_01-4722_Pita	JQ015473
0_1078_01-4723_Pita	JQ015477
0_1078_01-4724_Pita	JQ015481
0_1078_01-4725_Pita	JQ015484
0_1078_01-4726_Pita	JQ015486
0_1078_01-4727_Pita	JQ015476
0_1078_01-4728_Pita	JQ015472
0_1078_01-4729_Pita	JQ015474
0_10832_01-1673_Pita	FJ044791
0_10832_01-1674_Pita	FJ044795
0_10832_01-1677_Pita	FJ044796
0_10832_01-1678_Pita	FJ044794
0_10832_01-1681_Pita	FJ044792
0_10832_01-1682_Pita	FJ044804
0_10832_01-1684_Pita	FJ044803
0_10832_01-1685_Pita	FJ044800
0_10832_01-1687_Pita	FJ044798
0_10832_01-1688_Pita	FJ044805
0_10832_01-1691_Pira	JQ261657
0_10838_01-4735_Pita	FJ044823
0_10838_01-4736_Pita	FJ044809
0_10838_01-4737_Pita	FJ044808
0_10838_01-4738_Pita	FJ044817
0_10838_01-4739_Pita	FJ044818
0_10838_01-4740_Pita	FJ044813
0_10838_01-4741_Pita	FJ044811
0_10838_01-4742_Pita	FJ044807
0_10838_01-4743_Pita	FJ044819
0_10838_01-4744_Pita	FJ044816
0_10838_01-4745_Pita	FJ044822
0_10838_01-4746_Pita	FJ044815
0_10838_01-4747_Pita	FJ044810
0_10838_01-4748_Pita	FJ044824
0_10838_01-4749_Pita	FJ044814
0_10838_01-4750_Pita	FJ044820
0_10838_01-4751_Pita	FJ044812
0_10838_01-4752_Pita	FJ044821
0_10838_01-4753_Pira	JQ261658
0_10838_01-4754_Pila	JQ261659
0_10841_02-4585_Pita	JQ015673
0_10853_01-1307_Pita	FJ044852
0_10853_01-1310_Pita	FJ044843
0_10853_01-1314_Pita	FJ044842
0_10853_01-1315_Pita	FJ044841
0_10853_01-1322_Pita	FJ044847
0_10855_01-1423_Pita	FJ044859
0_10855_01-1432_Pita	FJ044857
0_10864_02-4597_Pita	FJ044899
0_10864_02-4601_Pita	FJ044902
0_10864_02-4603_Pita	FJ044904
0_10864_02-4606_Pita	FJ044898
0_10864_02-4608_Pita	FJ044901
0_10864_02-4609_Pita	FJ044896
0_10864_02-4612_Pita	FJ044892
0_10864_02-4614_Pita	FJ044903
0_10868_01-4597_Pita	FJ044923
0_10868_01-4598_Pita	FJ044924
0_10868_01-4599_Pita	FJ044912
0_10868_01-4600_Pita	FJ044916
0_10868_01-4601_Pita	FJ044910
0_10868_01-4602_Pita	FJ044914
0_10868_01-4603_Pita	JQ261660
0_10868_01-4604_Pita	FJ044913
0_10868_01-4605_Pita	FJ044917
0_10868_01-4606_Pita	FJ044915
0_10868_01-4607_Pita	FJ044919
0_10868_01-4608_Pita	FJ044909
0_10868_01-4609_Pita	FJ044922
0_10868_01-4610_Pita	FJ044918
0_10868_01-4611_Pita	FJ044911
0_10868_01-4612_Pita	FJ044908
0_10868_01-4614_Pita	FJ044921
0_10873_01-5914_Pita	FJ044930
0_10873_01-5915_Pita	FJ044927
0_10873_01-5916_Pita	FJ044937
0_10873_01-5920_Pita	FJ044929
0_10873_01-5922_Pita	FJ044932
0_10873_01-5924_Pita	FJ044933
0_10873_01-5926_Pita	FJ044936
0_10873_01-5927_Pita	FJ044931
0_10873_01-5928_Pita	FJ044934
0_10873_01-5929_Pita	FJ044928
0_10873_01-5930_Pita	FJ044925
0_10874_01-13472_Pira	JQ261662
0_10874_01-5798_Pita	FJ044950
0_10874_01-5799_Pita	FJ044938
0_10874_01-5801_Pita	FJ044952
0_10874_01-5802_Pita	FJ044954
0_10874_01-5803_Pita	FJ044944
0_10874_01-5805_Pita	FJ044940
0_10874_01-5806_Pita	FJ044943
0_10874_01-5807_Pita	FJ044941
0_10874_01-5808_Pita	FJ044945
0_10874_01-5809_Pita	FJ044953
0_10874_01-5811_Pita	FJ044946
0_10874_01-5812_Pita	FJ044939
0_10874_01-5813_Pita	FJ044948
0_10874_01-5815_Pita	FJ044949
0_10874_01-5817_Pila	JQ261661
0_1088_02-1237_Pita	FJ044992
0_1088_02-1238_Pita	FJ045001
0_1088_02-1239_Pita	FJ044993
0_1088_02-1242_Pita	FJ044997
0_1088_02-1247_Pita	FJ044995
0_1088_02-1248_Pita	FJ045006
0_1088_02-1250_Pita	FJ044998
0_1088_02-1253_Pita	FJ045003
0_10892_02-4804_Pita	FJ045009
0_10892_02-4805_Pita	FJ045019
0_10892_02-4806_Pita	FJ045018
0_10892_02-4807_Pita	FJ045025
0_10892_02-4808_Pita	FJ045008
0_10892_02-4809_Pita	FJ045017
0_10892_02-4810_Pita	FJ045010
0_10892_02-4811_Pita	FJ045012
0_10892_02-4812_Pita	FJ045013
0_10892_02-4813_Pita	FJ045011
0_10892_02-4814_Pita	FJ045021
0_10892_02-4815_Pita	FJ045022
0_10892_02-4816_Pita	FJ045015
0_10892_02-4817_Pita	FJ045014
0_10892_02-4818_Pita	FJ045016
0_10892_02-4819_Pita	FJ045023
0_10892_02-4820_Pita	FJ045024
0_10892_02-4821_Pita	FJ045020
0_10893_01-4634_Pita	FJ045032
0_10899_03-1260_Pita	FJ045043
0_10899_03-1262_Pita	FJ045051
0_10899_03-1263_Pita	FJ045055
0_10899_03-1266_Pita	FJ045056
0_10899_03-1268_Pita	FJ045057
0_10899_03-1269_Pita	FJ045052
0_10899_03-1270_Pita	FJ045050
0_10899_03-1271_Pita	FJ045054
0_10899_03-1272_Pita	FJ045044
0_10899_03-1273_Pita	FJ045046
0_10899_03-1274_Pita	FJ045048
0_10899_03-1276_Pita	FJ045045
0_10899_03-1277_Pira	JQ261663
0_10900_01-1606_Pita	JQ015675
0_10900_01-1612_Pita	JQ015674
0_10900_01-1613_Pita	JQ015676
0_10903_02-4758_Pita	JQ015682
0_10903_02-4759_Pita	JQ015687
0_10903_02-4760_Pita	JQ015690
0_10903_02-4761_Pita	JQ015678
0_10903_02-4762_Pita	JQ015680
0_10903_02-4763_Pita	JQ015694
0_10903_02-4764_Pita	JQ015689
0_10903_02-4765_Pita	JQ015693
0_10903_02-4766_Pita	JQ015688
0_10903_02-4767_Pita	JQ015685
0_10903_02-4768_Pita	JQ015684
0_10903_02-4769_Pita	JQ015686
0_10903_02-4770_Pita	JQ015691
0_10903_02-4771_Pita	JQ015679
0_10903_02-4772_Pita	JQ015681
0_10903_02-4773_Pita	JQ015677
0_10903_02-4774_Pita	JQ015692
0_10903_02-4775_Pita	JQ015683
0_10909_02-4828_Pita	FJ045068
0_10909_02-4830_Pita	FJ045065
0_10909_02-4831_Pita	FJ045072
0_10909_02-4832_Pita	FJ045059
0_10909_02-4833_Pita	FJ045061
0_10909_02-4834_Pita	FJ045064
0_10909_02-4837_Pita	FJ045062
0_10909_02-4841_Pita	FJ045060
0_10909_02-4844_Pita	FJ045067
0_10909_02-4845_Pira	JQ261664
0_10910_02-10056_Pila	JQ261665
0_10910_02-4658_Pita	FJ045090
0_10914_02-13471_Pira	JQ261666
0_10914_02-5732_Pita	FJ045106
0_10914_02-5733_Pita	FJ045105
0_10914_02-5735_Pita	FJ045098
0_10914_02-5737_Pita	FJ045091
0_10914_02-5740_Pita	FJ045099
0_10921_01-4023_Pita	FJ045108
0_10921_01-4024_Pita	FJ045113
0_10921_01-4025_Pita	FJ045112
0_10921_01-4026_Pita	FJ045117
0_10921_01-4027_Pita	FJ045116
0_10921_01-4028_Pita	FJ045110
0_10921_01-4029_Pita	FJ045122
0_10921_01-4030_Pita	FJ045115
0_10921_01-4031_Pita	FJ045120
0_10921_01-4032_Pita	FJ045114
0_10921_01-4034_Pita	FJ045121
0_10921_01-4035_Pita	FJ045119
0_10921_01-4036_Pita	FJ045111
0_10921_01-4037_Pita	FJ045118
0_10921_01-4038_Pita	FJ045109
0_10921_01-4040_Pira	JQ261667
0_10921_01-4041_Pila	JQ261668
0_10928_02-7500_Pita	FJ045127
0_10928_02-7501_Pita	FJ045124
0_10928_02-7503_Pita	FJ045126
0_10928_02-7504_Pita	FJ045123
0_10928_02-7505_Pita	FJ045137
0_10928_02-7506_Pita	FJ045135
0_10928_02-7507_Pita	FJ045138
0_10928_02-7508_Pita	FJ045139
0_10928_02-7509_Pita	FJ045133
0_10928_02-7510_Pita	FJ045125
0_10928_02-7511_Pita	FJ045131
0_10928_02-7512_Pita	FJ045128
0_10928_02-7513_Pita	FJ045140
0_10928_02-7514_Pita	FJ045134
0_10928_02-7515_Pita	FJ045136
0_10928_02-7516_Pita	FJ045129
0_10928_02-7517_Pita	FJ045132
0_10928_02-7518_Pira	JQ261669
0_10930_01-5936_Pita	JQ015696
0_10930_01-5937_Pita	JQ015705
0_10930_01-5938_Pita	JQ015698
0_10930_01-5939_Pita	JQ015697
0_10930_01-5940_Pita	JQ015703
0_10930_01-5941_Pita	JQ015701
0_10930_01-5942_Pita	JQ015710
0_10930_01-5943_Pita	JQ015700
0_10930_01-5944_Pita	JQ015706
0_10930_01-5945_Pita	JQ015709
0_10930_01-5946_Pita	JQ015712
0_10930_01-5947_Pita	JQ015708
0_10930_01-5948_Pita	JQ015702
0_10930_01-5949_Pita	JQ015711
0_10930_01-5950_Pita	JQ015707
0_10930_01-5951_Pita	JQ015699
0_10930_01-5952_Pita	JQ015704
0_10930_01-5953_Pita	JQ015713
0_10934_02-6235_Pita	FJ045142
0_10934_02-6236_Pita	FJ045149
0_10934_02-6237_Pita	FJ045148
0_10934_02-6238_Pita	FJ045153
0_10934_02-6239_Pita	FJ045151
0_10934_02-6240_Pita	FJ045146
0_10934_02-6241_Pita	FJ045154
0_10934_02-6242_Pita	FJ045156
0_10934_02-6243_Pita	FJ045152
0_10934_02-6244_Pita	FJ045143
0_10934_02-6245_Pita	FJ045144
0_10934_02-6246_Pita	FJ045155
0_10934_02-6247_Pita	FJ045145
0_10934_02-6248_Pita	FJ045141
0_10934_02-6249_Pita	FJ045157
0_10934_02-6250_Pita	FJ045150
0_10934_02-6251_Pita	FJ045158
0_10934_02-6252_Pita	FJ045147
0_10934_02-6253_Pira	JQ261670
0_10942_01-5960_Pita	FJ045173
0_10942_01-5961_Pita	FJ045165
0_10942_01-5962_Pita	FJ045169
0_10942_01-5963_Pita	FJ045176
0_10942_01-5964_Pita	FJ045160
0_10942_01-5965_Pita	FJ045161
0_10942_01-5966_Pita	FJ045171
0_10942_01-5967_Pita	FJ045162
0_10942_01-5968_Pita	FJ045168
0_10942_01-5969_Pita	FJ045175
0_10942_01-5971_Pita	FJ045164
0_10942_01-5972_Pita	FJ045163
0_10942_01-5974_Pita	FJ045172
0_10942_01-5975_Pita	FJ045166
0_10942_01-5976_Pita	FJ045170
0_10943_03-5982_Pita	FJ045177
0_10943_03-5983_Pita	FJ045178
0_10943_03-5984_Pita	FJ045194
0_10943_03-5985_Pita	FJ045182
0_10943_03-5986_Pita	FJ045183
0_10943_03-5987_Pita	FJ045188
0_10943_03-5988_Pita	FJ045181
0_10943_03-5989_Pita	FJ045184
0_10943_03-5991_Pita	FJ045187
0_10943_03-5992_Pita	FJ045192
0_10943_03-5993_Pita	FJ045185
0_10943_03-5994_Pita	FJ045190
0_10943_03-5995_Pita	FJ045191
0_10943_03-5996_Pita	FJ045179
0_10943_03-5998_Pita	FJ045180
0_10943_03-5999_Pita	FJ045193
0_10950_02-1443_Pita	FJ045201
0_10950_02-1444_Pita	FJ045207
0_10950_02-1445_Pita	FJ045198
0_10950_02-1446_Pita	FJ045204
0_10950_02-1447_Pita	FJ045208
0_10950_02-1448_Pita	FJ045195
0_10950_02-1450_Pita	FJ045199
0_10950_02-1451_Pita	FJ045196
0_10950_02-1453_Pita	FJ045203
0_10950_02-1454_Pita	FJ045200
0_10950_02-1456_Pita	FJ045205
0_10950_02-1457_Pita	FJ045197
0_10950_02-1459_Pita	FJ045202
0_10950_02-1461_Pira	JQ261671
0_10955_01-1628_Pita	FJ045222
0_10955_01-1630_Pita	FJ045209
0_10955_01-1631_Pita	FJ045216
0_10955_01-1632_Pita	FJ045215
0_10955_01-1635_Pita	FJ045210
0_10955_01-1636_Pita	FJ045218
0_10955_01-1637_Pita	FJ045220
0_10955_01-1638_Pita	FJ045219
0_10955_01-1639_Pita	FJ045225
0_10955_01-1641_Pita	FJ045223
0_10955_01-1644_Pita	FJ045221
0_10955_01-1645_Pira	JQ261672
0_10955_01-1646_Pila	JQ261673
0_10956_02-4048_Pita	FJ045227
0_10956_02-4052_Pita	FJ045233
0_10956_02-4053_Pita	FJ045228
0_10956_02-4060_Pita	FJ045229
0_10969_01-7761_Pita	FJ045247
0_10969_02-1474_Pita	FJ045257
0_10974_01-4367_Pita	FJ045275
0_10974_01-4368_Pita	FJ045281
0_10974_01-4369_Pita	FJ045273
0_10974_01-4370_Pita	FJ045272
0_10974_01-4371_Pita	FJ045282
0_10974_01-4372_Pita	FJ045271
0_10974_01-4374_Pita	FJ045270
0_10974_01-4375_Pita	FJ045274
0_10974_01-4376_Pita	FJ045280
0_10974_01-4377_Pita	FJ045285
0_10974_01-4378_Pita	FJ045277
0_10974_01-4379_Pita	FJ045276
0_10974_01-4380_Pita	FJ045279
0_10974_01-4381_Pita	FJ045283
0_10974_01-4382_Pita	FJ045286
0_10985_01-661_Pita	JQ015728
0_10985_01-663_Pita	JQ015727
0_10985_01-666_Pita	JQ015723
0_10985_01-667_Pita	JQ015721
0_10985_01-668_Pita	JQ015720
0_10985_01-669_Pita	JQ015724
0_10985_01-670_Pita	JQ015729
0_10985_01-671_Pita	JQ015726
0_10985_01-672_Pita	JQ015722
0_10985_01-673_Pita	JQ015717
0_10985_01-674_Pita	JQ015725
0_10985_01-675_Pita	JQ015719
0_10985_01-677_Pita	JQ015718
0_10985_01-678_Pita	JQ015716
0_10987_01-616_Pita	JQ015734
0_10987_01-619_Pita	JQ015735
0_10987_01-620_Pita	JQ015737
0_10987_01-621_Pita	JQ015732
0_10987_01-626_Pita	JQ015738
0_10987_01-627_Pita	JQ015733
0_10987_01-629_Pita	JQ015731
0_10987_01-631_Pita	JQ015736
0_11002_03-6120_Pita	FJ045338
0_11002_03-6121_Pita	FJ045322
0_11002_03-6122_Pita	FJ045326
0_11002_03-6123_Pita	FJ045336
0_11002_03-6124_Pita	FJ045333
0_11002_03-6125_Pita	FJ045325
0_11002_03-6126_Pita	FJ045332
0_11002_03-6127_Pita	FJ045327
0_11002_03-6128_Pita	FJ045339
0_11002_03-6129_Pita	FJ045330
0_11002_03-6130_Pita	FJ045324
0_11002_03-6131_Pita	FJ045323
0_11002_03-6132_Pita	FJ045328
0_11002_03-6133_Pita	FJ045337
0_11002_03-6134_Pita	FJ045334
0_11002_03-6135_Pita	FJ045335
0_11002_03-6136_Pita	FJ045331
0_11002_03-6137_Pita	FJ045329
0_11002_03-6138_Pira	JQ261674
0_11003_02-4666_Pita	FJ045354
0_11003_02-4667_Pita	FJ045344
0_11003_02-4669_Pita	FJ045349
0_11003_02-4670_Pita	FJ045357
0_11003_02-4671_Pita	FJ045348
0_11003_02-4672_Pita	FJ045353
0_11003_02-4673_Pita	FJ045350
0_11003_02-4674_Pita	FJ045343
0_11003_02-4675_Pita	FJ045346
0_11003_02-4676_Pita	FJ045347
0_11003_02-4677_Pita	FJ045355
0_11003_02-4678_Pita	FJ045341
0_11003_02-4679_Pita	FJ045345
0_11003_02-4680_Pita	FJ045351
0_11003_02-4681_Pita	FJ045352
0_11003_02-4682_Pita	FJ045340
0_11003_02-4683_Pita	FJ045356
0_11003_02-4684_Pira	JQ261675
0_11020_01-4691_Pita	FJ045382
0_11020_01-4692_Pita	FJ045389
0_11020_01-4693_Pita	FJ045388
0_11020_01-4694_Pita	FJ045376
0_11020_01-4695_Pita	FJ045391
0_11020_01-4698_Pita	FJ045393
0_11020_01-4699_Pita	FJ045383
0_11020_01-4700_Pita	FJ045377
0_11020_01-4701_Pita	FJ045392
0_11020_01-4702_Pita	FJ045390
0_11020_01-4703_Pita	FJ045379
0_11020_01-4704_Pita	FJ045378
0_11020_01-4706_Pita	FJ045387
0_11020_01-4707_Pira	JQ261676
0_11025_01-5913_Pita	FJ045409
0_11025_01-5915_Pita	FJ045410
0_11025_01-5916_Pita	FJ045408
0_11025_01-5918_Pita	FJ045395
0_11025_01-5919_Pita	FJ045399
0_11025_01-5921_Pita	FJ045394
0_11025_01-5922_Pita	FJ045407
0_11025_01-5923_Pita	FJ045397
0_11025_01-5924_Pita	FJ045402
0_11025_01-5925_Pita	FJ045396
0_11025_01-5926_Pita	FJ045403
0_11025_01-5927_Pita	FJ045398
0_11025_01-5929_Pita	FJ045406
0_11025_01-5930_Pita	FJ045400
0_11025_01-5931_Pira	JQ261677
0_11029_01-13504_Pira	JQ261678
0_11029_01-5936_Pita	FJ045419
0_11029_01-5937_Pita	FJ045414
0_11029_01-5939_Pita	FJ045428
0_11029_01-5940_Pita	FJ045418
0_11029_01-5941_Pita	FJ045417
0_11029_01-5942_Pita	FJ045422
0_11029_01-5943_Pita	FJ045424
0_11029_01-5944_Pita	FJ045412
0_11029_01-5945_Pita	FJ045413
0_11029_01-5946_Pita	FJ045426
0_11029_01-5947_Pita	FJ045425
0_11029_01-5948_Pita	FJ045427
0_11029_01-5949_Pita	FJ045415
0_11029_01-5950_Pita	FJ045421
0_11029_01-5951_Pita	FJ045416
0_11029_01-5953_Pita	FJ045423
0_11031_01-5960_Pita	JQ015744
0_11031_01-5961_Pita	JQ015740
0_11031_01-5967_Pita	JQ015743
0_11031_01-5972_Pita	JQ015742
0_11031_01-5974_Pita	JQ015741
0_11031_01-5976_Pita	JQ015745
0_11034_01-3976_Pita	FJ045441
0_11034_01-3977_Pita	FJ045439
0_11034_01-3978_Pita	FJ045432
0_11034_01-3979_Pita	FJ045435
0_11034_01-3980_Pita	FJ045440
0_11034_01-3981_Pita	FJ045445
0_11034_01-3983_Pita	FJ045430
0_11034_01-3984_Pita	FJ045443
0_11034_01-3985_Pita	FJ045442
0_11034_01-3986_Pita	FJ045431
0_11034_01-3987_Pita	FJ045433
0_11034_01-3988_Pita	FJ045446
0_11034_01-3989_Pita	FJ045444
0_11034_01-3990_Pita	FJ045436
0_11034_01-3991_Pita	FJ045437
0_11034_01-3992_Pita	FJ045447
0_11034_01-3993_Pita	FJ045434
0_11037_02-4712_Pita	FJ045463
0_11037_02-4713_Pita	FJ045454
0_11037_02-4714_Pita	FJ045461
0_11037_02-4715_Pita	FJ045465
0_11037_02-4716_Pita	FJ045453
0_11037_02-4717_Pita	FJ045448
0_11037_02-4718_Pita	FJ045457
0_11037_02-4719_Pita	FJ045455
0_11037_02-4720_Pita	FJ045464
0_11037_02-4721_Pita	FJ045449
0_11037_02-4722_Pita	FJ045456
0_11037_02-4723_Pita	FJ045450
0_11037_02-4724_Pita	FJ045458
0_11037_02-4725_Pita	FJ045459
0_11037_02-4726_Pita	FJ045452
0_11037_02-4727_Pita	FJ045460
0_11037_02-4728_Pita	FJ045451
0_11037_02-4729_Pita	FJ045462
0_11037_02-4730_Pira	JQ261679
0_11038_01-4390_Pita	FJ045476
0_11038_01-4392_Pita	FJ045474
0_11038_01-4393_Pita	FJ045473
0_11038_01-4394_Pita	FJ045471
0_11038_01-4395_Pita	FJ045480
0_11038_01-4396_Pita	FJ045481
0_11038_01-4397_Pita	FJ045467
0_11038_01-4398_Pita	FJ045470
0_11038_01-4399_Pita	FJ045466
0_11038_01-4400_Pita	FJ045478
0_11038_01-4401_Pita	FJ045472
0_11038_01-4402_Pita	FJ045479
0_11038_01-4403_Pita	FJ045477
0_11038_01-4404_Pita	FJ045468
0_11038_01-4405_Pita	FJ045475
0_11038_01-4406_Pita	FJ045482
0_11038_01-4407_Pita	FJ045469
0_11038_01-4408_Pira	HE799724
0_11041_01-4874_Pita	FJ045492
0_11041_01-4885_Pita	FJ045485
0_11051_02-1306_Pita	FJ045507
0_11051_02-1307_Pita	FJ045509
0_11051_02-1308_Pita	FJ045501
0_11051_02-1310_Pita	FJ045498
0_11051_02-1312_Pita	FJ045508
0_11051_02-1313_Pita	FJ045514
0_11051_02-1316_Pita	FJ045512
0_11051_02-1320_Pita	FJ045502
0_11051_02-1321_Pita	FJ045500
0_1105_01-592_Pita	JQ015503
0_1105_01-593_Pita	JQ015495
0_1105_01-594_Pita	JQ015502
0_1105_01-595_Pita	JQ015498
0_1105_01-596_Pita	JQ015499
0_1105_01-597_Pita	JQ015496
0_1105_01-598_Pita	JQ015493
0_1105_01-599_Pita	JQ015494
0_1105_01-601_Pita	JQ015489
0_1105_01-602_Pita	JQ015500
0_1105_01-604_Pita	JQ015491
0_1105_01-606_Pita	JQ015501
0_1105_01-607_Pita	JQ015497
0_1105_01-608_Pita	JQ015490
0_1105_01-609_Pita	JQ015492
0_11063_02-4415_Pita	JQ015752
0_11063_02-4416_Pita	JQ015754
0_11063_02-4417_Pita	JQ015758
0_11063_02-4418_Pita	JQ015751
0_11063_02-4419_Pita	JQ015749
0_11063_02-4421_Pita	JQ015755
0_11063_02-4422_Pita	JQ015756
0_11063_02-4423_Pita	JQ015759
0_11063_02-4424_Pita	JQ015750
0_11063_02-4425_Pita	JQ015757
0_11063_02-4426_Pita	JQ015748
0_11063_02-4427_Pita	JQ015747
0_11063_02-4429_Pita	JQ015753
0_11063_02-4430_Pita	JQ015746
0_11073_01-5755_Pita	FJ045519
0_11073_01-5757_Pita	FJ045530
0_11073_01-5759_Pita	FJ045515
0_11073_01-5766_Pita	FJ045524
0_11079_01-525_Pita	JQ015763
0_11079_01-526_Pita	JQ015766
0_11079_01-527_Pita	JQ015772
0_11079_01-529_Pita	JQ015768
0_11079_01-530_Pita	JQ015761
0_11079_01-531_Pita	JQ015765
0_11079_01-532_Pita	JQ015762
0_11079_01-533_Pita	JQ015767
0_11079_01-534_Pita	JQ015771
0_11079_01-535_Pita	JQ015764
0_11079_01-538_Pita	JQ015770
0_11079_01-540_Pita	JQ015769
0_11081_01-4344_Pita	FJ045540
0_11081_01-4345_Pita	FJ045550
0_11081_01-4346_Pita	FJ045546
0_11081_01-4348_Pita	FJ045535
0_11081_01-4350_Pita	FJ045541
0_11081_01-4352_Pita	FJ045545
0_11081_01-4354_Pita	FJ045549
0_11081_01-4355_Pita	FJ045542
0_11081_01-4356_Pita	FJ045544
0_11081_01-4357_Pita	FJ045539
0_11081_01-4359_Pita	FJ045537
0_11081_01-4360_Pita	FJ045548
0_11081_01-4361_Pita	FJ045533
0_11081_01-4362_Pira	JQ261680
0_11083_01-5034_Pita	FJ045551
0_11083_01-5035_Pita	FJ045552
0_11083_01-5036_Pita	FJ045563
0_11083_01-5037_Pita	FJ045559
0_11083_01-5038_Pita	FJ045568
0_11083_01-5040_Pita	FJ045554
0_11083_01-5041_Pita	FJ045564
0_11083_01-5042_Pita	FJ045553
0_11083_01-5043_Pita	FJ045566
0_11083_01-5044_Pita	FJ045562
0_11083_01-5045_Pita	FJ045567
0_11083_01-5046_Pita	FJ045565
0_11083_01-5048_Pita	FJ045560
0_11083_01-5049_Pita	FJ045558
0_11083_01-5050_Pita	FJ045555
0_11083_01-5051_Pita	FJ045561
0_11083_01-5052_Pira	JQ261681
0_11087_01-5775_Pita	FJ045582
0_11087_01-5776_Pita	FJ045569
0_11087_01-5777_Pita	FJ045574
0_11087_01-5778_Pita	FJ045573
0_11087_01-5780_Pita	FJ045578
0_11087_01-5782_Pita	FJ045576
0_11087_01-5784_Pita	FJ045571
0_11087_01-5785_Pita	FJ045580
0_11087_01-5786_Pita	FJ045572
0_11087_01-5788_Pita	FJ045584
0_11087_01-5790_Pita	FJ045581
0_11087_01-5791_Pita	FJ045583
0_11087_01-5792_Pita	FJ045575
0_11090_01-661_Pita	JQ015788
0_11090_01-662_Pita	JQ015773
0_11090_01-663_Pita	JQ015778
0_11090_01-664_Pita	JQ015774
0_11090_01-665_Pita	JQ015776
0_11090_01-667_Pita	JQ015777
0_11090_01-668_Pita	JQ015787
0_11090_01-669_Pita	JQ015784
0_11090_01-670_Pita	JQ015786
0_11090_01-671_Pita	JQ015783
0_11090_01-672_Pita	JQ015782
0_11090_01-673_Pita	JQ015779
0_11090_01-674_Pita	JQ015780
0_11090_01-675_Pita	JQ015785
0_11090_01-676_Pita	JQ015775
0_11090_01-678_Pita	JQ015781
0_11111_01-5798_Pita	FJ045593
0_11111_01-5800_Pita	FJ045595
0_11111_01-5801_Pita	FJ045588
0_11111_01-5802_Pita	FJ045599
0_11111_01-5803_Pita	FJ045594
0_11111_01-5806_Pita	FJ045600
0_11111_01-5812_Pita	FJ045585
0_11111_01-5814_Pita	FJ045598
0_11127_01-4390_Pita	JQ015793
0_11127_01-4394_Pita	JQ015791
0_11127_01-4401_Pita	JQ015794
0_11127_01-4403_Pita	JQ015790
0_11127_01-4404_Pita	JQ015792
0_11141_03-5983_Pita	FJ045631
0_11141_03-5985_Pita	FJ045625
0_11141_03-5987_Pita	FJ045624
0_11141_03-5989_Pita	FJ045620
0_11141_03-5992_Pita	FJ045619
0_11141_03-5993_Pita	FJ045634
0_11141_03-5994_Pita	FJ045629
0_11141_03-5995_Pita	FJ045632
0_11141_03-5996_Pita	FJ045633
0_11141_03-5997_Pita	FJ045623
0_11141_03-5999_Pita	FJ045621
0_11146_01-4620_Pita	FJ045641
0_11146_01-4621_Pita	FJ045648
0_11146_01-4622_Pita	FJ045637
0_11146_01-4623_Pita	FJ045649
0_11146_01-4624_Pita	FJ045643
0_11146_01-4625_Pita	FJ045638
0_11146_01-4626_Pita	FJ045647
0_11146_01-4627_Pita	FJ045640
0_11146_01-4628_Pita	FJ045646
0_11146_01-4629_Pita	FJ045645
0_11146_01-4630_Pita	FJ045650
0_11146_01-4631_Pita	FJ045653
0_11146_01-4632_Pita	FJ045652
0_11146_01-4633_Pita	FJ045636
0_11146_01-4634_Pita	FJ045644
0_11146_01-4635_Pita	FJ045642
0_11146_01-4636_Pita	FJ045639
0_11146_01-4637_Pita	FJ045651
0_11146_01-4638_Pira	JQ261682
0_11168_01-4413_Pita	FJ045666
0_11168_01-4414_Pita	FJ045665
0_11168_01-4415_Pita	FJ045660
0_11168_01-4416_Pita	FJ045659
0_11168_01-4418_Pita	FJ045662
0_11168_01-4419_Pita	FJ045655
0_11168_01-4420_Pita	FJ045669
0_11168_01-4421_Pita	FJ045668
0_11168_01-4422_Pita	FJ045658
0_11168_01-4423_Pita	FJ045657
0_11168_01-4424_Pita	FJ045661
0_11168_01-4426_Pita	FJ045663
0_11168_01-4427_Pita	FJ045654
0_11168_01-4428_Pita	FJ045664
0_11168_01-4430_Pita	FJ045656
0_1116_02-11704_Pira	JQ260962
0_1116_02-1613_Pita	FJ045680
0_11198_01-4645_Pita	FJ045709
0_11198_01-4647_Pita	FJ045712
0_11198_01-4648_Pita	FJ045714
0_11198_01-4649_Pita	FJ045711
0_11198_01-4650_Pita	FJ045710
0_11198_01-4652_Pita	FJ045707
0_11198_01-4653_Pita	FJ045706
0_11198_01-4654_Pita	FJ045704
0_11198_01-4656_Pita	FJ045715
0_11198_01-4657_Pita	FJ045713
0_11198_01-4660_Pita	FJ045708
0_11199_01-13585_Pira	JQ261683
0_11199_01-5128_Pita	FJ045716
0_11199_01-5130_Pita	FJ045727
0_11199_01-5131_Pita	FJ045724
0_11199_01-5133_Pita	FJ045721
0_11199_01-5134_Pita	FJ045728
0_11199_01-5137_Pita	FJ045725
0_11199_01-5141_Pita	FJ045719
0_11199_01-5142_Pita	FJ045731
0_11199_01-5143_Pita	FJ045718
0_11211_02-6741_Pita	FJ045779
0_11211_02-6742_Pita	FJ045774
0_11211_02-6743_Pita	FJ045773
0_11211_02-6744_Pita	FJ045765
0_11211_02-6747_Pita	FJ045770
0_11211_02-6748_Pita	FJ045767
0_11211_02-6752_Pita	FJ045778
0_11211_02-6754_Pita	FJ045764
0_11211_02-6755_Pita	FJ045766
0_11211_02-6756_Pita	FJ045772
0_11211_02-6757_Pita	FJ045775
0_11211_02-6758_Pita	FJ045777
0_11214_01-10997_Pira	JQ261684
0_11214_01-11034_Pila	JQ261685
0_11214_01-4736_Pita	FJ045784
0_11214_01-4744_Pita	FJ045789
0_11215_01-4345_Pita	JQ015797
0_11215_01-4355_Pita	JQ015795
0_11215_01-4360_Pita	JQ015796
0_11217_01-4643_Pita	FJ045808
0_11217_01-4644_Pita	FJ045804
0_11217_01-4645_Pita	FJ045816
0_11217_01-4646_Pita	FJ045810
0_11217_01-4647_Pita	FJ045812
0_11217_01-4648_Pita	FJ045801
0_11217_01-4649_Pita	FJ045813
0_11217_01-4650_Pita	FJ045809
0_11217_01-4651_Pita	FJ045814
0_11217_01-4652_Pita	FJ045806
0_11217_01-4653_Pita	FJ045802
0_11217_01-4655_Pita	FJ045799
0_11217_01-4656_Pita	FJ045807
0_11217_01-4657_Pita	FJ045800
0_11217_01-4658_Pita	FJ045811
0_11217_01-4659_Pita	FJ045815
0_11217_01-4660_Pita	FJ045805
0_11217_01-4661_Pira	JQ261686
0_11221_01-615_Pita	JQ015809
0_11221_01-616_Pita	JQ015803
0_11221_01-617_Pita	JQ015812
0_11221_01-618_Pita	JQ015804
0_11221_01-619_Pita	JQ015808
0_11221_01-620_Pita	JQ015800
0_11221_01-621_Pita	JQ015805
0_11221_01-622_Pita	JQ015814
0_11221_01-623_Pita	JQ015799
0_11221_01-624_Pita	JQ015798
0_11221_01-625_Pita	JQ015802
0_11221_01-626_Pita	JQ015813
0_11221_01-627_Pita	JQ015815
0_11221_01-628_Pita	JQ015801
0_11221_01-629_Pita	JQ015811
0_11221_01-630_Pita	JQ015810
0_11221_01-631_Pita	JQ015807
0_11221_01-632_Pita	JQ015806
0_11225_01-5913_Pita	FJ045823
0_11225_01-5914_Pita	FJ045834
0_11225_01-5915_Pita	FJ045818
0_11225_01-5916_Pita	FJ045831
0_11225_01-5917_Pita	FJ045825
0_11225_01-5918_Pita	FJ045820
0_11225_01-5919_Pita	FJ045822
0_11225_01-5921_Pita	FJ045828
0_11225_01-5922_Pita	FJ045829
0_11225_01-5923_Pita	FJ045821
0_11225_01-5924_Pita	FJ045832
0_11225_01-5925_Pita	FJ045819
0_11225_01-5926_Pita	FJ045827
0_11225_01-5927_Pita	FJ045826
0_11225_01-5928_Pita	FJ045830
0_11225_01-5929_Pita	FJ045817
0_11225_01-5930_Pita	FJ045824
0_1122_01-5938_Pita	FJ045839
0_1122_01-5940_Pita	FJ045841
0_1122_01-5943_Pita	FJ045837
0_1122_01-5944_Pita	FJ045836
0_1122_01-5946_Pita	FJ045840
0_1122_01-5950_Pita	FJ045842
0_1122_01-5951_Pita	FJ045838
0_1122_01-5952_Pita	FJ045835
0_11232_02-4369_Pita	FJ045854
0_11232_02-4370_Pita	FJ045855
0_11232_02-4371_Pita	FJ045850
0_11232_02-4372_Pita	FJ045856
0_11232_02-4376_Pita	FJ045859
0_11232_02-4377_Pita	FJ045851
0_11232_02-4379_Pita	FJ045846
0_11232_02-4380_Pita	FJ045843
0_11232_02-4381_Pita	FJ045858
0_11232_02-4383_Pita	FJ045845
0_11232_02-4384_Pita	FJ045849
0_1123_01-3999_Pita	FJ045873
0_1123_01-4000_Pita	FJ045863
0_1123_01-4001_Pita	FJ045862
0_1123_01-4002_Pita	FJ045864
0_1123_01-4003_Pita	FJ045861
0_1123_01-4006_Pita	FJ045869
0_1123_01-4008_Pita	FJ045872
0_1123_01-4009_Pita	FJ045875
0_1123_01-4017_Pira	JQ260963
0_11240_01-5936_Pita	FJ045888
0_11240_01-5937_Pita	FJ045880
0_11240_01-5938_Pita	FJ045892
0_11240_01-5939_Pita	FJ045885
0_11240_01-5940_Pita	FJ045891
0_11240_01-5941_Pita	FJ045893
0_11240_01-5942_Pita	FJ045895
0_11240_01-5943_Pita	FJ045881
0_11240_01-5944_Pita	FJ045883
0_11240_01-5945_Pita	FJ045882
0_11240_01-5946_Pita	FJ045878
0_11240_01-5947_Pita	FJ045894
0_11240_01-5948_Pita	FJ045890
0_11240_01-5949_Pita	FJ045889
0_11240_01-5950_Pita	FJ045879
0_11240_01-5951_Pita	FJ045884
0_11240_01-5952_Pita	FJ045887
0_11240_01-5953_Pita	FJ045886
0_11240_01-5954_Pira	JQ261687
0_11240_01-5955_Pila	JQ261688
0_11252_01-13672_Pira	JQ261689
0_11252_01-4666_Pita	FJ045899
0_11252_01-4667_Pita	FJ045908
0_11252_01-4668_Pita	FJ045905
0_11252_01-4669_Pita	FJ045911
0_11252_01-4670_Pita	FJ045897
0_11252_01-4671_Pita	FJ045910
0_11252_01-4672_Pita	FJ045898
0_11252_01-4673_Pita	FJ045901
0_11252_01-4674_Pita	FJ045900
0_11252_01-4675_Pita	FJ045902
0_11252_01-4676_Pita	FJ045903
0_11252_01-4677_Pita	FJ045904
0_11252_01-4679_Pita	FJ045906
0_11252_01-4680_Pita	FJ045909
0_11252_01-4681_Pita	FJ045912
0_11252_01-4682_Pita	FJ045896
0_11252_01-4683_Pita	FJ045907
0_11254_01-6051_Pita	FJ045920
0_11254_01-6052_Pita	FJ045919
0_11254_01-6053_Pita	FJ045924
0_11254_01-6054_Pita	FJ045925
0_11254_01-6055_Pita	FJ045917
0_11254_01-6056_Pita	FJ045930
0_11254_01-6057_Pita	FJ045929
0_11254_01-6058_Pita	FJ045926
0_11254_01-6059_Pita	FJ045928
0_11254_01-6060_Pita	FJ045922
0_11254_01-6061_Pita	FJ045916
0_11254_01-6062_Pita	FJ045913
0_11254_01-6063_Pita	FJ045921
0_11254_01-6064_Pita	FJ045914
0_11254_01-6065_Pita	FJ045915
0_11254_01-6066_Pita	FJ045918
0_11254_01-6067_Pita	FJ045923
0_11254_01-6068_Pita	FJ045927
0_11257_01-638_Pita	JQ015819
0_11257_01-643_Pita	JQ015820
0_11257_01-647_Pita	JQ015818
0_11257_01-649_Pita	JQ015817
0_11257_01-652_Pita	JQ015821
0_11266_02-4391_Pita	FJ045934
0_11266_02-4392_Pita	FJ045940
0_11266_02-4393_Pita	FJ045937
[truncated: 70,407 more rows]
