# Supplementary material for: The Evolutionary Genetics of the Genes Underlying Phenotypic Associations for Loblolly Pine (Pinus taeda, Pinaceae)
Source: Oxford University Press journal article supplement (doi:10.1534/genetics.113.157198), 2013-10-12
Supplement: tables1.pdf [file tables1.pdf]

**Table S1 Summary statistics across sample coverage classes.**

| Coverage class <sup>a</sup> | Count | $L_{total}$<br>(bp) | $L_{mean}$<br>(bp) | Masked Bases <sup>b</sup> | Masked SNPs <sup>b</sup> | $S_{total}$ | $S_{mean}$ | $r$   | $L_{total}/S_{total}$ | Indels |
|-----------------------------|-------|---------------------|--------------------|---------------------------|--------------------------|-------------|------------|-------|-----------------------|--------|
| 18                          | 898   | 295869              | 329                | 324                       | 1                        | 3032        | 3.38       | 0.359 | 97.58                 | 137    |
| 17                          | 755   | 258801              | 343                | 613                       | 4                        | 2989        | 3.96       | 0.395 | 86.58                 | 147    |
| 16                          | 559   | 195733              | 350                | 526                       | 3                        | 2162        | 3.87       | 0.297 | 90.53                 | 105    |
| 15                          | 374   | 135247              | 362                | 462                       | 3                        | 1611        | 4.31       | 0.401 | 83.95                 | 77     |
| 14                          | 339   | 125825              | 371                | 670                       | 1                        | 1602        | 4.73       | 0.283 | 78.54                 | 84     |
| 13                          | 278   | 105873              | 381                | 579                       | 4                        | 1313        | 4.72       | 0.339 | 80.63                 | 69     |
| 12                          | 276   | 105623              | 383                | 729                       | 3                        | 1158        | 4.20       | 0.304 | 91.21                 | 58     |
| 11                          | 236   | 88298               | 374                | 744                       | 2                        | 1181        | 5.00       | 0.203 | 74.76                 | 47     |
| 10                          | 215   | 83498               | 388                | 791                       | 4                        | 967         | 4.50       | 0.273 | 86.34                 | 47     |
| 9                           | 186   | 73161               | 393                | 522                       | 4                        | 988         | 5.31       | 0.168 | 74.05                 | 36     |
| 8                           | 199   | 76123               | 383                | 470                       | 4                        | 969         | 4.87       | 0.268 | 78.55                 | 45     |
| 7                           | 170   | 65349               | 384                | 405                       | 3                        | 943         | 5.55       | 0.351 | 69.30                 | 50     |
| 6                           | 169   | 68561               | 406                | 779                       | 6                        | 1048        | 6.20       | 0.264 | 65.42                 | 40     |
| 5                           | 177   | 69670               | 394                | 695                       | 9                        | 762         | 4.31       | 0.122 | 91.43                 | 37     |
| 4                           | 178   | 71503               | 402                | 575                       | 0                        | 715         | 4.02       | 0.178 | 100.00                | 35     |
| 3                           | 197   | 82293               | 418                | 686                       | 2                        | 704         | 3.57       | 0.216 | 116.89                | 36     |
| 2                           | 250   | 105399              | 422                | 899                       | 0                        | 835         | 3.34       | 0.113 | 126.23                | 30     |
| 1                           | 316   | 132942              | 421                | 753                       | NA                       | NA          | NA         | NA    | NA                    | NA     |

**Abbreviations:** bp, base pairs; Indels, insertion-deletion events;  $L$ , length;  $r$ , Pearson's correlation coefficient between the number of segregating sites and the length of the amplicon (bp);  $S$ , segregating sites; SNPs, single nucleotide polymorphisms.

<sup>a</sup>Sample size in the alignment (i.e. the number of sequences).

<sup>b</sup>Masked bases are the number of aligned sites with at least one base masked due to its quality score < 30.
