# Supplementary material for: The Evolutionary Genetics of the Genes Underlying Phenotypic Associations for Loblolly Pine (Pinus taeda, Pinaceae)
Source: Oxford University Press journal article supplement (doi:10.1534/genetics.113.157198), 2013-10-12
Supplement: tables2.pdf [file tables2.pdf]

**Table S2 Summary by coding versus noncoding regions for each coverage class.**

| Coverage Class <sup>a</sup> | Count | <i>L</i><br>total | <i>L</i><br>coding | <i>L</i><br>noncoding | Masked <i>L</i><br>coding <sup>b</sup> | Masked <i>L</i><br>noncoding <sup>b</sup> | <i>S</i><br>coding | <i>S</i><br>noncoding | Masked <i>S</i><br>coding <sup>b</sup> | Masked <i>S</i><br>noncoding <sup>b</sup> |
|-----------------------------|-------|-------------------|--------------------|-----------------------|----------------------------------------|-------------------------------------------|--------------------|-----------------------|----------------------------------------|-------------------------------------------|
| 18                          | 541   | 183938            | 125940             | 57998                 | 138                                    | 76                                        | 1045               | 641                   | 0                                      | 0                                         |
| 17                          | 422   | 153028            | 100226             | 52802                 | 262                                    | 131                                       | 891                | 674                   | 2                                      | 1                                         |
| 16                          | 302   | 111593            | 71956              | 39637                 | 220                                    | 74                                        | 521                | 568                   | 0                                      | 0                                         |
| 15                          | 218   | 84201             | 56940              | 27261                 | 232                                    | 62                                        | 474                | 344                   | 2                                      | 0                                         |
| 14                          | 192   | 74973             | 45635              | 29338                 | 293                                    | 154                                       | 360                | 498                   | 0                                      | 1                                         |
| 13                          | 140   | 54967             | 38671              | 16296                 | 205                                    | 30                                        | 361                | 211                   | 1                                      | 0                                         |
| 12                          | 160   | 63364             | 42051              | 21313                 | 364                                    | 142                                       | 353                | 229                   | 3                                      | 0                                         |
| 11                          | 120   | 48291             | 30583              | 17708                 | 334                                    | 115                                       | 247                | 222                   | 1                                      | 0                                         |
| 10                          | 115   | 44879             | 30935              | 13944                 | 491                                    | 54                                        | 227                | 137                   | 1                                      | 0                                         |
| 9                           | 88    | 38335             | 24047              | 14288                 | 163                                    | 71                                        | 254                | 139                   | 1                                      | 0                                         |
| 8                           | 103   | 41122             | 23613              | 17509                 | 132                                    | 161                                       | 165                | 158                   | 1                                      | 0                                         |
| 7                           | 79    | 31723             | 21421              | 10302                 | 129                                    | 101                                       | 257                | 134                   | 1                                      | 0                                         |
| 6                           | 80    | 34431             | 21666              | 12765                 | 262                                    | 136                                       | 283                | 140                   | 1                                      | 1                                         |
| 5                           | 103   | 42626             | 27736              | 14890                 | 254                                    | 198                                       | 222                | 169                   | 3                                      | 4                                         |
| 4                           | 93    | 37578             | 24879              | 12699                 | 193                                    | 89                                        | 198                | 94                    | 0                                      | 0                                         |
| 3                           | 95    | 41177             | 27362              | 13815                 | 223                                    | 159                                       | 208                | 86                    | 1                                      | 0                                         |
| 2                           | 136   | 56143             | 36340              | 19803                 | 277                                    | 93                                        | 206                | 95                    | 0                                      | 0                                         |
| 1                           | 174   | 75124             | 46686              | 28438                 | 197                                    | 139                                       | NA                 | NA                    | NA                                     | NA                                        |

**Abbreviations:** *L*, length; *S*, segregating sites.

<sup>a</sup>Sample size in the alignment (i.e. the number of sequences).

<sup>b</sup>Masked bases are the number of aligned sites with at least one base masked due to its quality score < 30.
