# Supplementary material for: The Evolutionary Genetics of the Genes Underlying Phenotypic Associations for Loblolly Pine (Pinus taeda, Pinaceae)
Source: Oxford University Press journal article supplement (doi:10.1534/genetics.113.157198), 2013-10-12
Supplement: tables4.pdf [file tables4.pdf]

**Table S4** Likelihood scores for assessing models of genome-wide nucleotide diversity ( $\theta = 4N_e\mu$ ) that are constant or variable across loci using the method outlined by Hudson (1990). Estimates of nucleotide diversity are per locus.

| Model                                     | logL                         | -2logL   | P             |
|-------------------------------------------|------------------------------|----------|---------------|
| All sites                                 |                              |          |               |
| Constant $\theta$                         | -15627.58<br>$\theta = 1.33$ |          |               |
| Variable $\theta$<br>( <i>df</i> = 5,455) | -8301.572                    | 14652.02 | $P < 2.2e-16$ |
| NS sites                                  |                              |          |               |
| Constant $\theta$                         | -4175.475<br>$\theta = 0.39$ |          |               |
| Variable $\theta$<br>( <i>df</i> = 2,480) | -1745.141                    | 4860.67  | $P < 2.2e-16$ |
| SY sites                                  |                              |          |               |
| Constant $\theta$                         | -4030.923<br>$\theta = 0.44$ |          |               |
| Variable $\theta$<br>( <i>df</i> = 2,480) | -2086.158                    | 3889.53  | $P < 2.2e-16$ |
| NC sites                                  |                              |          |               |
| Constant $\theta$                         | -6102.177<br>$\theta = 0.49$ | 8125.56  |               |
| Variable $\theta$<br>( <i>df</i> = 2,480) | -2039.397                    |          | $P < 2.2e-16$ |

**Abbreviations:** *df*, degrees of freedom; NC, noncoding; NS, nonsynonymous; SY, synonymous.
