# Supplementary material for: The Evolutionary Genetics of the Genes Underlying Phenotypic Associations for Loblolly Pine (Pinus taeda, Pinaceae)
Source: Oxford University Press journal article supplement (doi:10.1534/genetics.113.157198), 2013-10-12
Supplement: tables5.pdf [file tables5.pdf]

**Table S5 Indels affected levels of nucleotide diversity and divergence.** Illustrated are results from Student  $t$ -tests ( $t$ ) with Welch corrections for unequal variances.  $P$ -values were determined parametrically ( $P$ ) and non-parametrically ( $P_{perm}$ ) using permutations. The permutation-based tests randomized the data with respect to presence or absence of indels and then used the distribution for the  $t$ -statistic based on 10,000 randomizations as the null distribution with which to compare to the observed  $t$ -statistic. Note that parametric  $t$ -tests were used here because we were interested in comparing means (which the Wilcoxon-rank sum test does not). Use of nonparametric tests gave the same results (data not shown).

| Statistic       | mean<br>(- indels) | mean<br>(+ indels) | $t$    | $df$     | $P$       | $P_{perm}$ |
|-----------------|--------------------|--------------------|--------|----------|-----------|------------|
| $S$             | 3.03               | 7.79               | -19.34 | 1200.157 | <2.2e-16  | <1.0e-04   |
| $h_1$           | 1.64               | 4.09               | -13.33 | 1179.734 | <2.2e-16  | <1.0e-04   |
| $\theta_{\pi}$  | 0.0028             | 0.0074             | -13.33 | 1178.909 | <2.2e-16  | <1.0e-04   |
| $D_{xy}$ (Pira) | 0.0073             | 0.0106             | -7.24  | 875.017  | 9.537e-13 | <1.0e-04   |
| $D_{xy}$ (Pila) | 0.0415             | 0.0515             | -4.26  | 157.005  | 3.441e-05 | 0.0008     |
| $k$             | 2.82               | 4.17               | -19.85 | 1447.415 | <2.2e-16  | <1.0e-04   |
| $H_d$           | 0.39               | 0.62               | -24.17 | 1854.041 | <2.2e-16  | <1.0e-04   |
| Tajima's $D$    | -0.47              | -0.36              | -3.15  | 1538.623 | 0.001660  | 0.009      |
| $n$             | 11.99              | 12.10              | -1.56  | 1851.381 | 0.116912  | 0.225      |
| Noncoding (bp)  | 203.46             | 226.93             | -2.86  | 578.456  | 0.004265  | 0.047      |

**Abbreviations:** bp, base pairs;  $df$ , degrees of freedom;  $D_{xy}$ , nucleotide divergence;  $H_d$ , haplotypic diversity; indels, insertion-deletion events;  $k$ , the number of haplotypes;  $n$ , sample size;  $h_1$ , singletons or the first class of the folded site-frequency spectrum; Pila, *Pinus lambertiana*; Pira, *Pinus radiata*;  $S$ , segregating sites;  $\theta_{\pi}$ , nucleotide diversity based on the average number of pairwise differences (per site).
