# Supplementary material for: The Evolutionary Genetics of the Genes Underlying Phenotypic Associations for Loblolly Pine (Pinus taeda, Pinaceae)
Source: Oxford University Press journal article supplement (doi:10.1534/genetics.113.157198), 2013-10-12
Supplement: tables6.pdf [file tables6.pdf]

**Table S6 Nucleotide diversity (per site) across linkage groups of loblolly pine (*Pinus taeda* L.). Values are weighted averages (see Materials and Methods).**

| LG | <i>l</i> | <i>l</i>    | <i>l</i> | <i>n</i>    | <i>n</i> | <i>S</i> | <i>S</i> | <i>S</i> | <i>S</i> | <i>S</i> | $\theta_{\pi}$ | $\theta_{\pi}$ | $\theta_{\pi}$ | $\theta_{\pi}$ | $\theta_w$ | $\theta_w$ | $\theta_w$ | $\theta_w$ |
|----|----------|-------------|----------|-------------|----------|----------|----------|----------|----------|----------|----------------|----------------|----------------|----------------|------------|------------|------------|------------|
|    | All      | <i>n</i> >1 | Ann      | <i>n</i> >1 | Ann      | All      | Ann      | NS       | SY       | NC       | All            | NS             | SY             | NC             | All        | NS         | SY         | NC         |
| 1  | 72       | 72          | 36       | 13.0        | 13.6     | 3.6      | 3.5      | 1.4      | 1.1      | 1.4      | 0.00323        | 0.00167        | 0.00550        | 0.00194        | 0.00320    | 0.00169    | 0.00478    | 0.00192    |
| 2  | 115      | 111         | 55       | 12.5        | 13.2     | 5.6      | 4.4      | 1.4      | 1.6      | 1.8      | 0.00467        | 0.00167        | 0.00792        | 0.00269        | 0.00486    | 0.00192    | 0.00708    | 0.00282    |
| 3  | 116      | 111         | 55       | 12.2        | 12.0     | 4.4      | 4.0      | 0.9      | 1.7      | 1.7      | 0.00383        | 0.00116        | 0.00892        | 0.00271        | 0.00381    | 0.00137    | 0.00855    | 0.00303    |
| 4  | 94       | 94          | 58       | 12.8        | 12.7     | 5.1      | 4.8      | 1.1      | 1.7      | 2.2      | 0.00421        | 0.00180        | 0.00839        | 0.00357        | 0.00418    | 0.00164    | 0.00784    | 0.00358    |
| 5  | 117      | 113         | 64       | 12.7        | 12.8     | 5.4      | 5.2      | 1.4      | 1.8      | 2.4      | 0.00390        | 0.00150        | 0.00843        | 0.00427        | 0.00430    | 0.00171    | 0.00895    | 0.00447    |
| 6  | 118      | 114         | 59       | 13.2        | 13.5     | 4.8      | 4.6      | 1.5      | 1.4      | 2.5      | 0.00394        | 0.00165        | 0.00710        | 0.00246        | 0.00431    | 0.00201    | 0.00771    | 0.00299    |
| 7  | 113      | 108         | 57       | 12.5        | 12.9     | 4.7      | 4.5      | 1.3      | 1.6      | 2.2      | 0.00369        | 0.00127        | 0.00793        | 0.00312        | 0.00390    | 0.00161    | 0.00749    | 0.00345    |
| 8  | 136      | 131         | 70       | 12.7        | 13.4     | 4.5      | 4.5      | 1.1      | 1.8      | 2.4      | 0.00389        | 0.00154        | 0.00865        | 0.00270        | 0.00394    | 0.00148    | 0.00929    | 0.00272    |
| 9  | 99       | 97          | 54       | 12.7        | 12.6     | 5.3      | 4.9      | 1.0      | 2.0      | 2.4      | 0.00399        | 0.00126        | 0.00802        | 0.00259        | 0.00422    | 0.00129    | 0.01039    | 0.00281    |
| 10 | 114      | 112         | 59       | 13.0        | 12.6     | 5.1      | 5.1      | 1.5      | 1.8      | 2.5      | 0.00458        | 0.00205        | 0.00859        | 0.00411        | 0.00473    | 0.00215    | 0.00790    | 0.00400    |
| 11 | 101      | 99          | 49       | 12.6        | 13.4     | 5.3      | 6.1      | 2.2      | 2.3      | 2.9      | 0.00416        | 0.00241        | 0.00910        | 0.00356        | 0.00434    | 0.00259    | 0.00998    | 0.00365    |
| 12 | 111      | 106         | 57       | 12.6        | 13.5     | 4.7      | 4.3      | 1.3      | 1.8      | 1.9      | 0.00414        | 0.00143        | 0.00838        | 0.00283        | 0.00422    | 0.00166    | 0.00847    | 0.00259    |

**Abbreviations:** All, all aligned sites; Ann, annotated; *l*, number of loci; LG, linkage group; *n*, sample size; NC, noncoding; NS, nonsynonymous; *S*, segregating sites; SY, synonymous;  $\theta_{\pi}$ , nucleotide diversity based on the average number of pairwise differences;  $\theta_w$ , nucleotide diversity based on the number of segregating sites following Watterson (1975).
