# Supplementary material for: The Evolutionary Genetics of the Genes Underlying Phenotypic Associations for Loblolly Pine (Pinus taeda, Pinaceae)
Source: Oxford University Press journal article supplement (doi:10.1534/genetics.113.157198), 2013-10-12
Supplement: tables7.pdf [file tables7.pdf]

**Table S7 Nucleotide divergence (per site) across linkage groups of loblolly pine (*Pinus taeda* L.). Values are weighted averages (see Materials and Methods).**

| LG | <i>l</i> | <i>n</i> | $D_{xy\_pira}$ | $D_{xy\_pira}$ | $D_{xy\_pira}$ | $D_{xy\_pira}$ | $D_{xy\_pila}$ | $D_{xy\_pila}$ | $D_{xy\_pila}$ | $D_{xy\_pila}$ |
|----|----------|----------|----------|----------|----------|----------|----------|----------|----------|----------|----------|----------|----------|----------|----------------|----------------|----------------|----------------|----------------|----------------|----------------|----------------|
|    | All      | OG       | Ann      | Pira     | Ann      | Pila     | Ann      | OG       | Ann      | Pira     | Ann      | Pila     | Ann      | All      | NS             | SY             | NC             | All            | NS             | SY             | NC             |                |
| 1  | 72       | 56       | 28       | 55       | 27       | 13       | 11       | 14.2     | 14.3     | 14.2     | 14.3     | 13.0     | 13.0     | 0.00907  | 0.00466        | 0.01236        | 0.01106        | 0.04078        | 0.02505        | 0.07176        | 0.04304        |                |
| 2  | 115      | 75       | 42       | 71       | 40       | 22       | 17       | 13.7     | 14.0     | 13.8     | 14.2     | 13.6     | 13.8     | 0.00912  | 0.00285        | 0.01564        | 0.00893        | 0.05205        | 0.03017        | 0.11096        | 0.05828        |                |
| 3  | 116      | 76       | 39       | 74       | 38       | 18       | 12       | 13.6     | 13.5     | 13.6     | 13.4     | 14.5     | 14.0     | 0.00746  | 0.00289        | 0.01396        | 0.00524        | 0.03902        | 0.01590        | 0.09227        | 0.06016        |                |
| 4  | 94       | 64       | 37       | 62       | 36       | 22       | 14       | 13.9     | 14.2     | 14.0     | 14.5     | 15.1     | 14.9     | 0.00760  | 0.00336        | 0.01064        | 0.00802        | 0.03617        | 0.01130        | 0.06300        | 0.04315        |                |
| 5  | 117      | 76       | 43       | 72       | 39       | 17       | 13       | 13.8     | 13.7     | 14.1     | 14.3     | 13.2     | 12.0     | 0.00748  | 0.00305        | 0.01612        | 0.01107        | 0.04278        | 0.01286        | 0.07615        | 0.06620        |                |
| 6  | 118      | 75       | 40       | 70       | 36       | 15       | 10       | 14.6     | 14.6     | 14.5     | 14.4     | 16.2     | 16.5     | 0.00682  | 0.00305        | 0.01164        | 0.00474        | 0.03951        | 0.03065        | 0.11051        | 0.04546        |                |
| 7  | 113      | 62       | 34       | 61       | 33       | 17       | 12       | 14.0     | 14.2     | 14.0     | 14.2     | 15.4     | 14.7     | 0.00888  | 0.00386        | 0.01302        | 0.00846        | 0.05446        | 0.02924        | 0.10919        | 0.05925        |                |
| 8  | 136      | 96       | 51       | 89       | 47       | 31       | 21       | 13.7     | 14.6     | 13.8     | 14.5     | 13.7     | 15.3     | 0.00802  | 0.00318        | 0.01093        | 0.00881        | 0.04171        | 0.01661        | 0.07830        | 0.04353        |                |
| 9  | 99       | 72       | 41       | 70       | 40       | 14       | 9        | 13.8     | 13.6     | 13.8     | 13.7     | 11.7     | 10.6     | 0.00657  | 0.00187        | 0.01001        | 0.00624        | 0.04235        | 0.01622        | 0.05880        | 0.03843        |                |
| 10 | 114      | 81       | 47       | 78       | 45       | 17       | 13       | 13.6     | 13.4     | 13.8     | 13.8     | 12.2     | 10.8     | 0.00849  | 0.00490        | 0.02144        | 0.00941        | 0.04195        | 0.01747        | 0.10651        | 0.05827        |                |
| 11 | 101      | 65       | 35       | 63       | 34       | 11       | 7        | 14.0     | 14.5     | 14.1     | 14.4     | 14.5     | 15.6     | 0.00727  | 0.00268        | 0.00901        | 0.00713        | 0.03943        | 0.02152        | 0.06913        | 0.03439        |                |
| 12 | 111      | 72       | 37       | 71       | 36       | 15       | 10       | 13.5     | 14.3     | 13.5     | 14.2     | 12.5     | 14.5     | 0.00643  | 0.00229        | 0.00846        | 0.00724        | 0.04396        | 0.01373        | 0.07085        | 0.05323        |                |

**Abbreviations:** All, all aligned sites; Ann, annotated;  $D_{xy}$ , nucleotide divergence; *l*, number of loci; LG, linkage group; *n*, sample size; NC, noncoding; NS, nonsynonymous; OG, outgroup present (i.e. either a single sequence of *Pinus lambertiana* or *P. radiata* or both is available for the amplicon); Pila, *Pinus lambertiana*; Pira, *Pinus radiata*; SY, synonymous.
