# Supplementary material for: The Evolutionary Genetics of the Genes Underlying Phenotypic Associations for Loblolly Pine (Pinus taeda, Pinaceae)
Source: Oxford University Press journal article supplement (doi:10.1534/genetics.113.157198), 2013-10-12
Supplement: tables10.pdf [file tables10.pdf]

**Table S10 List of joint outliers with respect to Tajima's *D* and Fay and Wu's *H* that were annotated with respect to putative gene products.**

| Amplicon         | Putative gene product                                                                                                         | Tajima's <i>D</i> | Fay and Wu's <i>H</i> |
|------------------|-------------------------------------------------------------------------------------------------------------------------------|-------------------|-----------------------|
| 0_10631_01       | HSP7NAT-2 (HEAT-SHOCK PROTEIN 7NAT-2); ATP binding                                                                            | -1.84             | -5.18                 |
| 0_10631_02       | HSP7NAT-2 (HEAT-SHOCK PROTEIN 7NAT-2); ATP binding                                                                            | -1.71             | -3.42                 |
| 0_12117_01       | universal stress protein (USP) family protein                                                                                 | -1.70             | -5.25                 |
| 0_3461_01        | DIN1NA (DARK INDUCIBLE 1NA); hydrolase, hydrolyzing O-glycosyl compounds                                                      | -2.14             | -8.18                 |
| 0_8408_01        | glyoxal oxidase-related                                                                                                       | -1.82             | -3.22                 |
| 0_8694_01        | sodium:solute symporter family protein                                                                                        | -2.08             | -8.60                 |
| 0_9825_01        | DIR1 (DEFECTIVE IN INDUCED RESISTANCE 1); lipid binding / lipid transporter                                                   | -1.85             | -5.23                 |
| 2_4925_01        | zinc finger (C3HC4-type RING finger) family protein                                                                           | -1.72             | -6.87                 |
| 2_6183_01        | CRK1NA (CYSTEINE-RICH RLK1NA); ATP binding / kinase/ protein kinase/ protein serine/threonine kinase/ protein tyrosine kinase | -2.08             | -4.85                 |
| 2_9466_01        | membrane-associated zinc metalloprotease, putative                                                                            | -1.85             | -3.34                 |
| CL1344Contig1_03 | PFK2 (PHOSPHOFRUCTOKINASE 2); 6-phosphofructokinase                                                                           | -1.71             | -3.45                 |
| CL162Contig1_01  | pectinesterase family protein                                                                                                 | -1.82             | -5.08                 |
| CL2463Contig1_03 | TMKL1 (transmembrane kinase-like 1); ATP binding / kinase/ protein serine/threonine kinase                                    | -1.69             | -3.34                 |
| CL4663Contig1_02 | FTSZ1-1; protein binding / structural molecule                                                                                | -1.85             | -3.34                 |
| UMN_3361_01      | DNA-binding protein, putative                                                                                                 | -1.82             | -5.08                 |
| UMN_5367_02      | chaperonin, putative                                                                                                          | -1.69             | -5.20                 |
