# Supplementary material for: The Evolutionary Genetics of the Genes Underlying Phenotypic Associations for Loblolly Pine (Pinus taeda, Pinaceae)
Source: Oxford University Press journal article supplement (doi:10.1534/genetics.113.157198), 2013-10-12
Supplement: tables11.pdf [file tables11.pdf]

**Table S11 Summary of model fitting in a McDonald-Kreitman framework for all amplicons that were annotated and had *Pinus radiata* as an outgroup ( $I = 1,623$ ).**

| Model                                                                                            | $k$  | $\ln L$   | AICc     |
|--------------------------------------------------------------------------------------------------|------|-----------|----------|
| $\theta = \text{constant}, ut = \text{constant}, f = 0, \alpha = 0$                              | 2    | -12064.81 | 24133.62 |
| $\theta = \text{constant}, ut = \text{constant}, f = \text{constant}, \alpha = 0$                | 3    | -10067.49 | 20140.99 |
| $\theta = \text{constant}, ut = \text{constant}, f = \text{unique}, \alpha = 0$                  | 1625 | -7548.09  | 19432.19 |
| $\theta = \text{unique}, ut = \text{constant}, f = 0, \alpha = 0$                                | 1624 | -9320.81  | 22974.07 |
| $\theta = \text{unique}, ut = \text{constant}, f = \text{constant}, \alpha = 0$                  | 1625 | -7330.06  | 18996.13 |
| $\theta = \text{unique}, ut = \text{constant}, f = \text{unique}, \alpha = 0$                    | 3247 | -5725.23  | 24446.46 |
| $\theta = \text{constant}, ut = \text{constant}, f = 0, \alpha = \text{constant}$                | 3    | -11203.01 | 22412.02 |
| $\theta = \text{constant}, ut = \text{constant}, f = \text{constant}, \alpha = \text{constant}$  | 4    | -10061.02 | 20130.04 |
| $\theta = \text{constant}, ut = \text{constant}, f = \text{unique}, \alpha = \text{constant}$    | 1626 | -7522.02  | 19383.60 |
| $\theta = \text{unique}, ut = \text{constant}, f = 0, \alpha = \text{constant}$                  | 1625 | -8668.88  | 21673.77 |
| $\theta = \text{unique}, ut = \text{constant}, f = \text{constant}, \alpha = \text{constant}$    | 1626 | -7298.35  | 18936.13 |
| $\theta = \text{unique}, ut = \text{constant}, f = \text{unique}, \alpha = \text{constant}$      | 3248 | -5716.25  | 24436.52 |
| $\theta = \text{constant}, ut = \text{constant}, f = 0, \alpha = \text{beta}$                    | 4    | -11949.69 | 23907.38 |
| $\theta = \text{constant}, ut = \text{constant}, f = \text{constant}, \alpha = \text{beta}$      | 5    | -9834.78  | 19679.57 |
| $\theta = \text{constant}, ut = \text{constant}, f = \text{unique}, \alpha = \text{beta}$        | 1627 | -7510.3   | 19363.73 |
| $\theta = \text{unique}, ut = \text{constant}, f = 0, \alpha = \text{beta}$                      | 1626 | -9309.12  | 22957.81 |
| $\theta = \text{unique}, ut = \text{constant}, f = \text{constant}, \alpha = \text{beta}$        | 1627 | -7270.93  | 18884.98 |
| $\theta = \text{unique}, ut = \text{constant}, f = \text{unique}, \alpha = \text{beta}$          | 3249 | -5714.08  | 24440.19 |
| $\theta = \text{constant}, ut = \text{constant}, f = 0, \alpha = \text{two-spike}$               | 5    | -11006.98 | 22023.97 |
| $\theta = \text{constant}, ut = \text{constant}, f = \text{constant}, \alpha = \text{two-spike}$ | 6    | -9869.41  | 19750.84 |
| $\theta = \text{constant}, ut = \text{constant}, f = \text{unique}, \alpha = \text{two-spike}$   | 1628 | -7494.66  | 19336.01 |
| $\theta = \text{unique}, ut = \text{constant}, f = 0, \alpha = \text{two-spike}$                 | 1627 | -8591.69  | 21526.51 |
| $\theta = \text{unique}, ut = \text{constant}, f = \text{constant}, \alpha = \text{two-spike}$   | 1628 | -7274.38  | 18895.45 |
| $\theta = \text{unique}, ut = \text{constant}, f = \text{unique}, \alpha = \text{two-spike}$     | 3250 | -5705.77  | 24431.60 |
| $\theta = \text{constant}, ut = \text{unique}, f = 0, \alpha = 0$                                | 1624 | -10830.79 | 25994.03 |
| $\theta = \text{constant}, ut = \text{unique}, f = \text{constant}, \alpha = 0$                  | 1625 | -8836.12  | 22008.24 |
| $\theta = \text{constant}, ut = \text{unique}, f = \text{unique}, \alpha = 0$                    | 3247 | -6828.13  | 26652.26 |
| $\theta = \text{unique}, ut = \text{unique}, f = 0, \alpha = 0$                                  | 3246 | -8541.03  | 30070.05 |
| $\theta = \text{unique}, ut = \text{unique}, f = \text{constant}, \alpha = 0$                    | 3247 | -6551.34  | 26098.68 |
| $\theta = \text{unique}, ut = \text{unique}, f = \text{unique}, \alpha = 0$                      | 4869 | -5098.53  | 49173.07 |
| $\theta = \text{constant}, ut = \text{unique}, f = 0, \alpha = \text{constant}$                  | 1625 | -9865.29  | 24066.59 |
| $\theta = \text{constant}, ut = \text{unique}, f = \text{constant}, \alpha = \text{constant}$    | 1626 | -8836.08  | 22011.72 |
| $\theta = \text{constant}, ut = \text{unique}, f = \text{unique}, \alpha = \text{constant}$      | 3248 | -6820.54  | 26645.10 |
| $\theta = \text{unique}, ut = \text{unique}, f = 0, \alpha = \text{constant}$                    | 3247 | -7662.37  | 28320.75 |
| $\theta = \text{unique}, ut = \text{unique}, f = \text{constant}, \alpha = \text{constant}$      | 3248 | -6548.89  | 26101.79 |
| $\theta = \text{constant}, ut = \text{unique}, f = \text{unique}, \alpha = \text{constant}$      | 4870 | -5093.23  | 49194.52 |

|                                                                                                |      |           |          |
|------------------------------------------------------------------------------------------------|------|-----------|----------|
| $\theta = \text{constant}, ut = \text{unique}, f = 0, \alpha = \text{beta}$                    | 1626 | -10830.79 | 26001.15 |
| $\theta = \text{constant}, ut = \text{unique}, f = \text{constant}, \alpha = \text{beta}$      | 1627 | -8835.43  | 22013.99 |
| $\theta = \text{constant}, ut = \text{unique}, f = \text{unique}, \alpha = \text{beta}$        | 3249 | -6820.56  | 26653.16 |
| $\theta = \text{unique}, ut = \text{unique}, f = 0, \alpha = \text{beta}$                      | 3248 | -8541.03  | 30086.07 |
| $\theta = \text{unique}, ut = \text{unique}, f = \text{constant}, \alpha = \text{beta}$        | 3249 | -6550.46  | 26112.96 |
| $\theta = \text{unique}, ut = \text{unique}, f = \text{unique}, \alpha = \text{beta}$          | 4871 | -5093.25  | 49226.66 |
| $\theta = \text{constant}, ut = \text{unique}, f = 0, \alpha = \text{two-spiked}$              | 1627 | -9863.55  | 24070.22 |
| $\theta = \text{constant}, ut = \text{unique}, f = \text{constant}, \alpha = \text{two-spike}$ | 1628 | -8833.74  | 22014.17 |
| $\theta = \text{constant}, ut = \text{unique}, f = \text{unique}, \alpha = \text{two-spike}$   | 3250 | -6820.54  | 26661.14 |
| $\theta = \text{unique}, ut = \text{unique}, f = 0, \alpha = \text{two-spike}$                 | 3249 | -7660.96  | 28333.96 |
| $\theta = \text{unique}, ut = \text{unique}, f = \text{constant}, \alpha = \text{two-spike}$   | 3250 | -6547.15  | 26114.35 |
| $\theta = \text{unique}, ut = \text{unique}, f = \text{unique}, \alpha = \text{two-spike}$     | 4872 | -5093.23  | 49258.75 |

---

**Abbreviations:** AICc, corrected Akaike Information Criterion;  $\alpha$ , fraction new mutations driven to fixation by positive selection; beta, the Beta distribution; constant, a constant value of a parameter across all amplicons;  $f$ , the fraction of amplicons not under strong purifying selection;  $k$ , number of model parameters;  $l$ , number of loci or amplicons;  $\ln L$ , log-likelihood;  $\theta$ , expected neutral diversity; two-spike, two-spiked multimodal distribution; unique, unique value of a parameter for each amplicon;  $ut$ , expected neutral divergence.
