# Supplementary material for: The Evolutionary Genetics of the Genes Underlying Phenotypic Associations for Loblolly Pine (Pinus taeda, Pinaceae)
Source: Oxford University Press journal article supplement (doi:10.1534/genetics.113.157198), 2013-10-12
Supplement: tables12.pdf [file tables12.pdf]

**Table S12 Functional categories of amplicons and signatures of selection. These are the raw data used in Figure 4 to which loess smoothing was applied. Values for the Direction of Selection statistic (DoS) and Tajima's *D* are weighted averages where the weights are the sample size.**

| Functional category                                                                                          | Assoc | Unassoc | Total | DoS    | <i>D</i> (NS) | <i>D</i> (SY) |
|--------------------------------------------------------------------------------------------------------------|-------|---------|-------|--------|---------------|---------------|
| zinc.finger.proteins                                                                                         | 4     | 10      | 29    | -0.189 | -0.524        | -0.838        |
| isomerase.activity.topoisomerase.epimerase.isomerases.                                                       | 3     | 6       | 19    | -0.134 | -0.931        | -0.587        |
| ATPases                                                                                                      | 4     | 6       | 18    | -0.125 | -0.495        | 0.009         |
| vitamin.binding.Vitamin.B6.anthocyanidin.flavin.dependent.beta.carotene.                                     | 5     | 13      | 34    | -0.109 | -0.366        | -0.509        |
| calmodulin.binding.proteins.Calmodulin.                                                                      | 6     | 8       | 34    | -0.101 | -0.063        | 0.037         |
| ion.channel.glutamate.gated.ion.channel.KAB.potassium.channels.CLC.                                          | 2     | 8       | 15    | -0.094 | -0.417        | -0.981        |
| vesicle.mediated.transport.VAMP.VPS.exosomes.coatomer.NEAP.exocysts.                                         | 2     | 12      | 26    | -0.082 | -0.708        | -1.032        |
| Glycosidase.chitinase.glycosylase.glycosidase.glucanase.                                                     | 7     | 16      | 50    | -0.079 | -0.634        | -0.394        |
| signal.transducers.transducins.protein.kinases.                                                              | 4     | 17      | 38    | -0.071 | -0.697        | -0.362        |
| pigment.binding.light.receptors.chlorophyll.                                                                 | 0     | 9       | 14    | -0.045 | -0.508        | -1.183        |
| structural.constituent.of.ribosome.ribosomal.subunits.                                                       | 5     | 23      | 43    | -0.029 | -0.363        | -0.499        |
| structural.constituent.of.cell.wall.actin.tubulin.extensin.expansin.arabinogalactans.                        | 5     | 24      | 56    | -0.017 | -0.384        | -0.191        |
| stress.response.USP.                                                                                         | 3     | 11      | 26    | -0.015 | -0.339        | -0.495        |
| hormone.binding.auxin.receptors.ethylene.receptors.brassinosteroid.receptors.                                | 11    | 24      | 72    | -0.004 | -0.341        | -0.228        |
| Protease.Peptidase.serine.threonine.kinases.endopeptidases.aspartyl.metalloproteases.TMK.cysteine.proteases. | 18    | 65      | 152   | -0.003 | -0.602        | -0.701        |
| peroxidases.cationic.peroxidase.Haem.peroxidase.                                                             | 10    | 14      | 38    | 0.004  | -0.456        | -0.626        |
| ubiquitin.ligase.PUB.f.box.ubiquitin.protein.ligase.                                                         | 5     | 25      | 65    | 0.008  | -0.647        | -0.647        |
| hydrolases.HAD.hydrolases.                                                                                   | 19    | 28      | 90    | 0.010  | -0.450        | -0.551        |
| transporters.ABC.transporter.OPT.POT.nodulin.amino.acid.transporter.MATE.MDR.hexose.transporter.permease.    | 22    | 51      | 136   | 0.012  | -0.269        | -0.455        |
| pectin.esterases.pectinesterase.                                                                             | 1     | 10      | 17    | 0.014  | -0.690        | -0.817        |
| oxidoreductases.cytochrome.P450.cytochrome.c.catalases.dehydrogenases.reductases.                            | 27    | 70      | 219   | 0.027  | -0.509        | -0.291        |
| disease.resistance.NBS.                                                                                      | 3     | 19      | 45    | 0.027  | -0.214        | -0.464        |
| GTPase.GTP.binding.RAB.GTPase.RAS.GTPase.RAN.GTPase.                                                         | 3     | 11      | 35    | 0.033  | -0.315        | -0.236        |

|                                                                                                             |    |    |     |       |        |        |
|-------------------------------------------------------------------------------------------------------------|----|----|-----|-------|--------|--------|
| transcription.factors.Myb.Myc.GRAS.WRKY.bZIP.ARR.                                                           | 19 | 52 | 132 | 0.041 | -0.536 | -0.324 |
| chromatin.binding.RCC1.chromosome.condensation.complex.chromatin.<br>remodeling.histone.proteins.           | 5  | 17 | 35  | 0.043 | -0.317 | 0.519  |
| RNA.polymerase.RDR.RNA.polymerase.                                                                          | 2  | 9  | 14  | 0.043 | 0.027  | 0.037  |
| lyase.activity.dehydratase.pectate.lyase.carbon.sulfer.lyase.                                               | 8  | 25 | 70  | 0.043 | -0.388 | -0.583 |
| transferases.PFK.glucuronosyltransferases.SEC.                                                              | 22 | 80 | 219 | 0.045 | -0.410 | -0.300 |
| nucleic.acid.nucleotide.binding.Anth.retinoblastoma.argonaute.BLHL.<br>VARICOSE.SWAP.DNA.Polymerase.        | 16 | 48 | 135 | 0.060 | -0.378 | -0.084 |
| lipid.binding.lipase.phospholipase.EXL.clathrin.associated.complex.                                         | 6  | 17 | 50  | 0.062 | -0.616 | -0.370 |
| translation.Initiation.elongation.Factors.EIFG.elongation.factors.                                          | 3  | 6  | 19  | 0.063 | -0.512 | -0.416 |
| water.channel.aquaporins.MIP.TIP.HOS.                                                                       | 0  | 7  | 9   | 0.081 | -0.412 | 0.125  |
| electron.transporter.photosystems.cytochrome.b6.photo.assimilate.                                           | 6  | 6  | 16  | 0.104 | -0.350 | -1.164 |
| heat.shock.HSP.DnaJ.                                                                                        | 7  | 33 | 71  | 0.112 | -0.574 | -0.357 |
| carbohydrate.binding.sucrase.glyoxyl.oxidase.VTC.INT.lectin.protein.kinase.<br>carbohydrate.protein.kinase. | 5  | 16 | 32  | 0.140 | -0.665 | -0.831 |
| phosphatase.regulator.activity.phosphatase.2.pho1.phosphatases.NIF.                                         | 2  | 9  | 15  | 0.140 | -0.986 | -1.019 |
| ligase.activity.synthetases.ligases.                                                                        | 0  | 5  | 20  | 0.212 | -0.566 | 0.084  |
| metal.cluster.binding.embryo.defective.proteins.germis.Rieske.ALS.ferredoxins.                              | 5  | 25 | 50  | 0.230 | -0.623 | -0.258 |
| microtubule.motor.proteins.kinesin.microtubule.                                                             | 3  | 6  | 12  | 0.374 | -0.790 | -0.713 |

**Abbreviations:** Assoc, associated to at least one phenotype; *D*, Tajima's *D*; DoS, Direction of Selection statistic (Stoletzki and Eyre-Walker 2011); NS, nonsynonymous; SY, synonymous; Unassoc, unassociated to at least one phenotype.
