# Supplementary figures and images for: The Evolutionary Genetics of the Genes Underlying Phenotypic Associations for Loblolly Pine (Pinus taeda, Pinaceae)
Source: Oxford University Press journal article supplement (doi:10.1534/genetics.113.157198), 2013-10-12

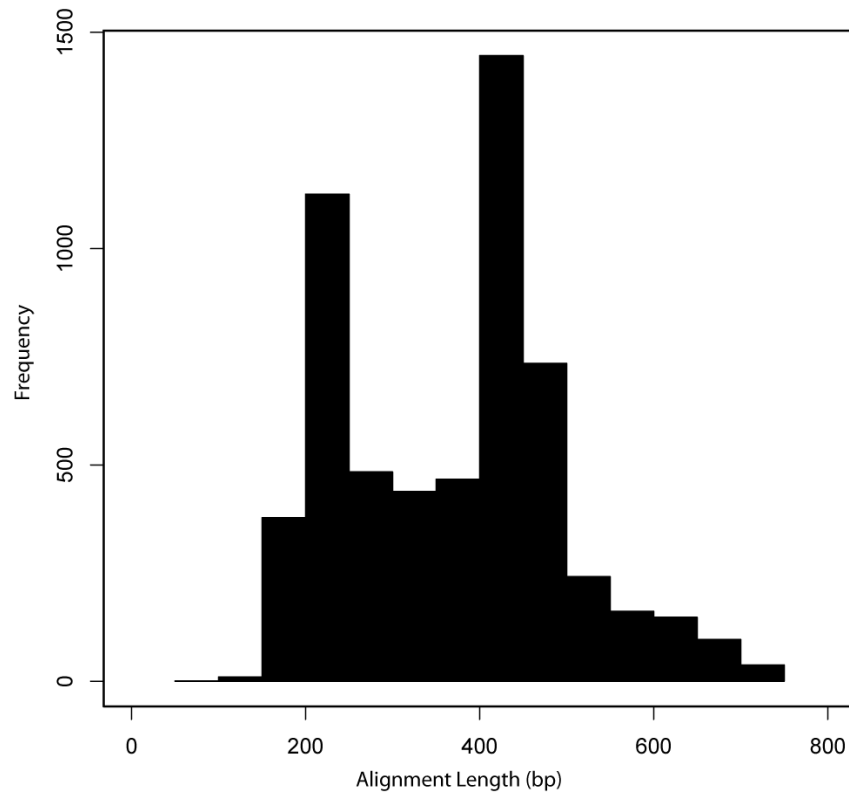

**Figure S3** The distribution of the number of aligned sites across amplicons is strongly bimodal.

Supplement: figures3.pdf [file figures3.pdf]
